# Supplementary material for: Leishmania (Leishmania) amazonensis induces macrophage miR-294 and miR-721 expression and modulates infection by targeting NOS2 and L-arginine metabolism
Source: PubMed Central journal article supplement (PMC5343489; doi:10.1038/srep44141), 2017-03-09
Supplement: srep44141-s1.pdf [file srep44141-s1.pdf]

## **Supporting information**

***Leishmania (Leishmania) amazonensis* induces macrophage miR-294 and miR-721 expression and modulates infection by targeting NOS2 and L-arginine metabolism**

**Sandra Marcia Muxel<sup>1</sup>, Maria Fernanda Laranjeira-Silva, Ricardo Andrade Zampieri, Lucile Maria Floeter-Winter<sup>1</sup>.**

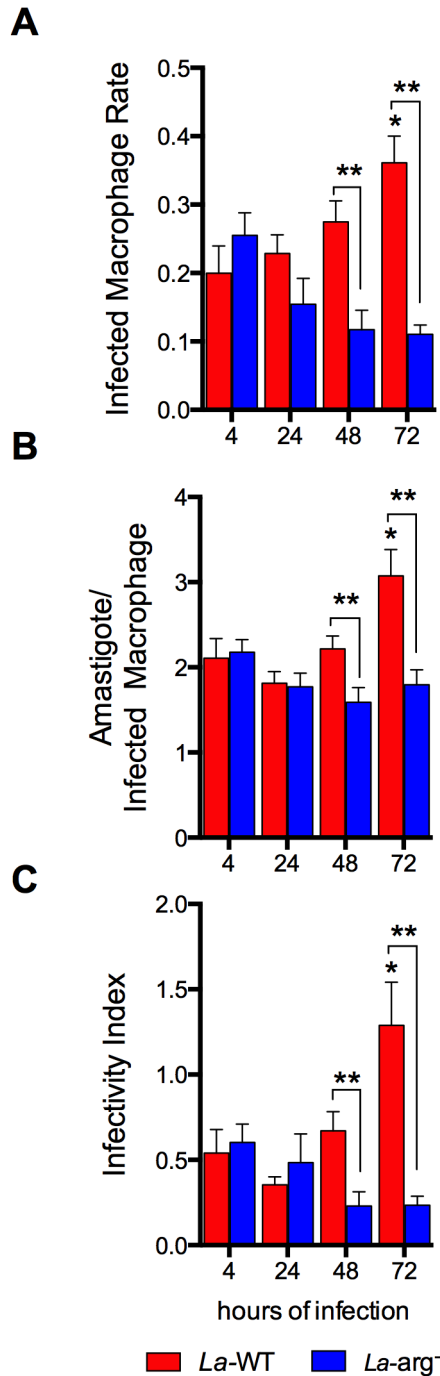

**Supplementary Figure S1: Comparative analysis of BMDMs infected with *La*-WT and *La*-arg<sup>-</sup> *L. (L.) amazonensis*.** BMDMs ( $2 \times 10^5$ ) were plated into chamber slides overnight and infected with *La*-WT or *La*-arg<sup>-</sup> *L. (L.) amazonensis* (MOI 5:1). After 4 h, the cultures were washed and maintained for 12, 24, 48 and 72 h. The plates were fixed and stained with Giemsa, and the index of infection was determined via microscopic counting of infected macrophages and amastigotes per macrophage. The data represent the mean  $\pm$  SEM of 3 independent experiments ( $n = 600$  macrophages). \*,  $p < 0.05$ , compared to 4 hours of infection. \*\*,  $p < 0.05$ , WT compared to *La*-arg<sup>-</sup>.

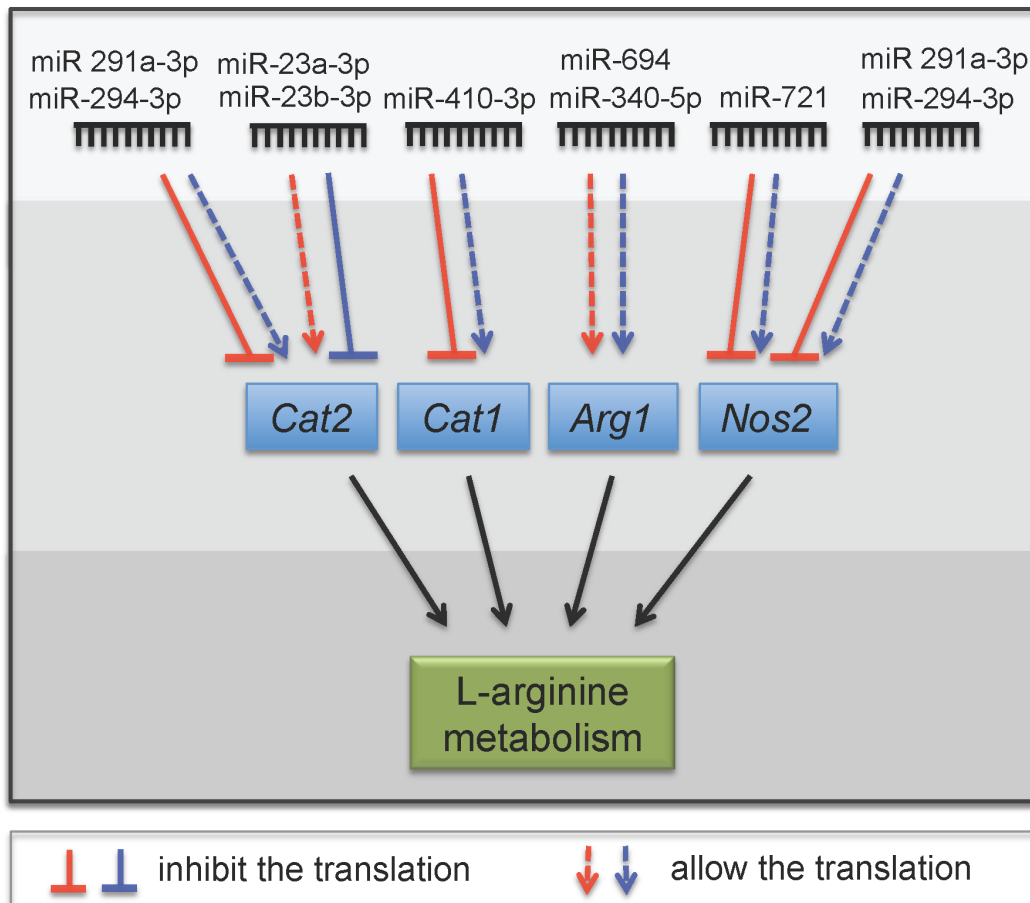

**Supplementary Figure S2: Schematic representation of in silico analysis results from the search for predicted mRNA targets for the miRNAs modulated during *L. (L.) amazonensis* infection.** The predicted mRNA targets for the miRNAs modulated during *La*-WT (red lines) or *La-arg*<sup>-</sup> (blue lines) *L. (L.) amazonensis* infection suggested the modulation of mRNAs that code for enzymes involved in arginine metabolism, such as miR-291 and miR-294, which target *Cat2b* and/or *Nos2*, miR-410, which targets *Cat1*, and miR-721, which targets *Nos2*. Predictions were made using microRNA.org, TargetScan and the miRWalk database.

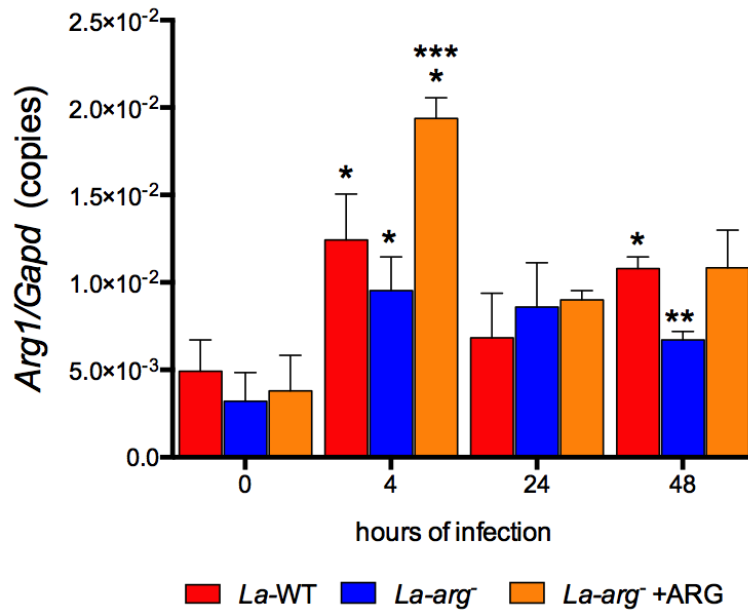

**Supplementary Figure S3: Arg1 mRNA in BMDMs infected by *La*-WT, *La*-*arg*<sup>-</sup> and *La*-*arg*<sup>-</sup>+ARG *L. (L.) amazonensis*.** BMDMs ( $1 \times 10^6$ ) were plated overnight and co-cultivated with *La*-WT (red) or *La*-*arg*<sup>-</sup> (blue) or *La*-*arg*<sup>-</sup>+ARG (orange) *L. (L.) amazonensis* (MOI 5:1). After 4, 24 and 48 h of infection, the Arg1 mRNA from *L. (L.) amazonensis* was quantified via RT-qPCR. Each bar represents the mean  $\pm$  SEM of the values obtained in 3 independent experiments. \*,  $p < 0.05$ , compared to uninfected macrophages (0 hours of infection). \*\*\*,  $p < 0.05$ , WT compared to *La*-*arg*<sup>-</sup>. \*\*,  $p < 0.05$ , *La*-*arg*<sup>-</sup>+ARG compared to *La*-*arg*<sup>-</sup>.

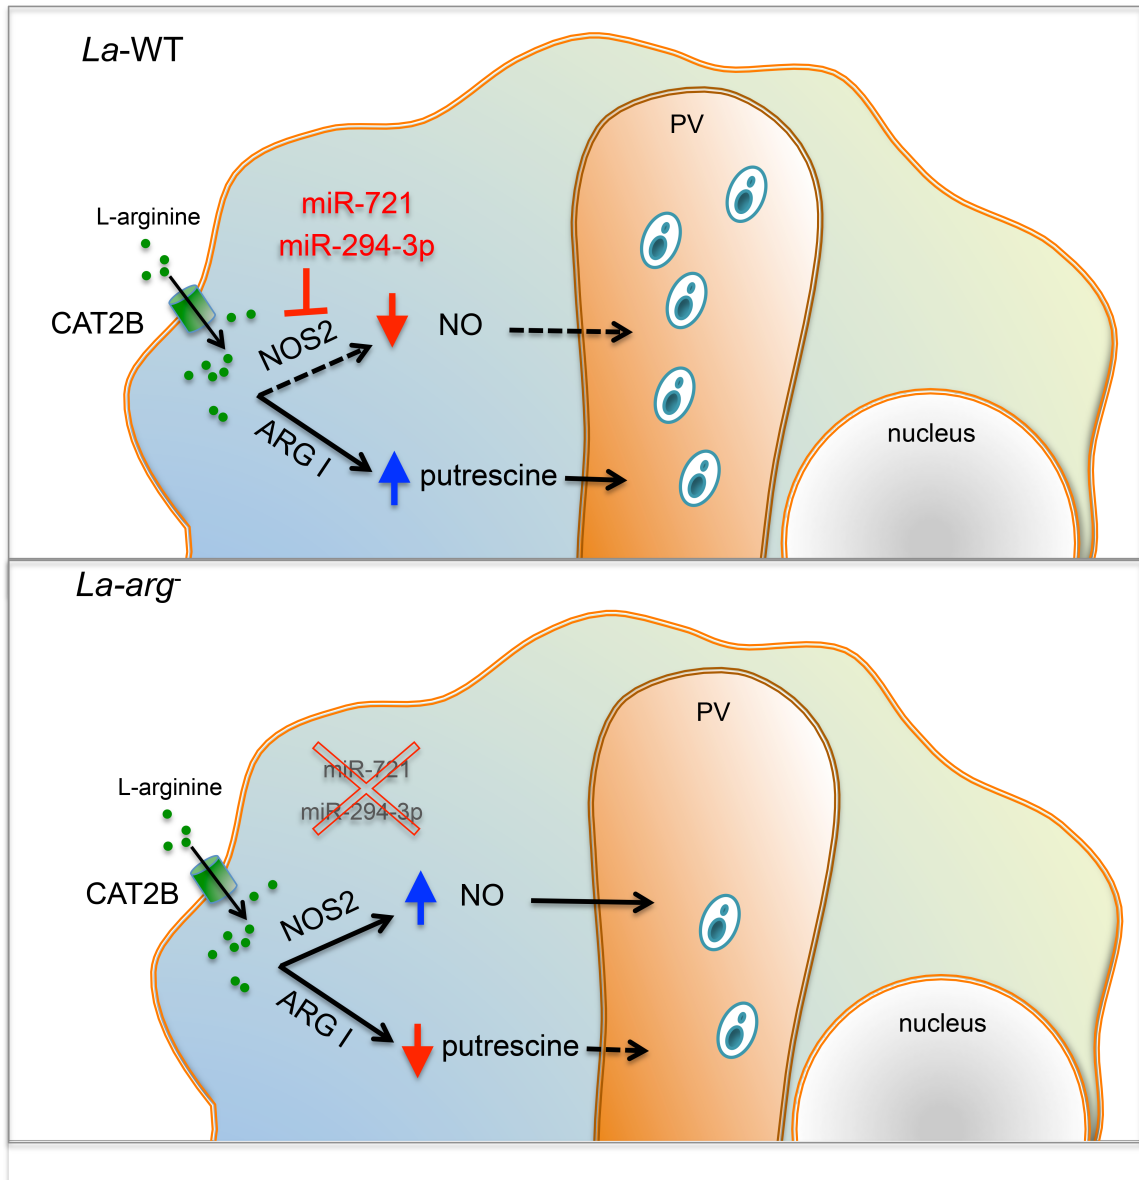

**Supplementary Figure S4: Schematic representation of the effects of miR-294 and miR-721/*Nos2* mRNA targets in the L-arginine/NO pathway during *L. (L.) amazonensis* infection.** Infection of macrophages increases the activity of polyamine pathways that promote *Leishmania* survival by increasing the expression of the host L-arginine transporters CAT2B and CAT1, which increase L-arginine uptake and ARG1 activity. At the same time, the negative regulation of the NOS2- and NO-producing pathway, which was induced by the miR-294 and miR-721 expression that degraded *Nos2* mRNA, consequently inhibited NO production and parasite killing. PV: parasitophorous.

S1 Table: Macrophage miRNA regulation during WT *L. (L.) amazonensis* (*La*-WT) infection. Fold (Fold regulation) represents the fold change results at a biological magnitude. Values > 1 indicate positive regulation and values < 1 indicate negative regulation.

| miRNA       | <i>La</i> -WT - 4 h |         | <i>La</i> -WT - 12 h |         | <i>La</i> -WT - 24 h |         | <i>La</i> -WT - 48 h |         |
|-------------|---------------------|---------|----------------------|---------|----------------------|---------|----------------------|---------|
|             | Fold                | p-value | Fold                 | p-value | Fold                 | p-value | Fold                 | p-value |
| let-7a-5p   | 1.17                | 0.8820  | 1.40                 | 0.7732  | -1.01                | 0.6689  | -1.16                | 0.4418  |
| let-7b-5p   | 1.04                | 0.9237  | -1.05                | 0.9237  | -1.27                | 0.6551  | 1.14                 | 0.9976  |
| let-7c-5p   | -1.08               | 0.8911  | -1.28                | 0.7589  | -1.05                | 0.8007  | 1.09                 | 0.9803  |
| let-7d-5p   | 1.02                | 0.8191  | -1.14                | 0.9079  | 1.05                 | 0.8512  | 1.02                 | 0.7536  |
| let-7e-5p   | 1.07                | 0.8194  | -1.19                | 0.7045  | 1.41                 | 0.4324  | 1.37                 | 0.4697  |
| let-7f-5p   | 1.34                | 0.6283  | -1.07                | 0.9370  | 1.71                 | 0.4744  | 1.41                 | 0.4973  |
| let-7g-5p   | 1.34                | 0.4750  | -1.21                | 0.6552  | 1.36                 | 0.4630  | 1.64                 | 0.3109  |
| let-7i-5p   | -1.10               | 0.9861  | -1.55                | 0.0552  | 1.41                 | 0.3460  | 1.78                 | 0.1056  |
| miR-106a-5p | -1.01               | 0.9079  | -1.81                | 0.1971  | 1.19                 | 0.6802  | 1.05                 | 0.9804  |
| miR-106b-5p | 1.16                | 0.8894  | -1.49                | 0.5804  | 1.68                 | 0.4968  | 1.58                 | 0.5048  |
| miR-1192    | -1.19               | 0.9557  | 1.67                 | 0.3468  | 1.09                 | 0.9705  | -1.04                | 0.9532  |
| miR-126a-5p | 1.05                | 0.9178  | 1.07                 | 0.7431  | -1.09                | 0.5843  | -2.34                | 0.0961  |
| miR-128-3p  | 1.03                | 0.9162  | 1.18                 | 0.6576  | 1.01                 | 0.9521  | -1.04                | 0.7376  |
| miR-130a-3p | -1.14               | 0.8207  | 1.08                 | 0.7742  | 1.25                 | 0.8675  | 1.09                 | 0.8775  |
| miR-130b-3p | -1.06               | 0.8585  | -1.00                | 0.7952  | -1.11                | 0.7662  | -1.19                | 0.4197  |
| miR-135a-5p | 1.87                | 0.4177  | 1.49                 | 0.4584  | -1.00                | 0.8662  | -1.09                | 0.5180  |
| miR-140-5p  | 1.23                | 0.4755  | 1.24                 | 0.5097  | 1.93                 | 0.2335  | 2.22                 | 0.1081  |
| miR-144-3p  | -1.78               | 0.5229  | -1.18                | 0.6482  | -2.04                | 0.0045  | -1.13                | 0.1340  |
| miR-155-5p  | -1.03               | 0.9675  | 1.14                 | 0.9405  | -1.33                | 0.5555  | -1.63                | 0.3313  |
| miR-15a-5p  | -1.02               | 0.8139  | -1.43                | 0.7338  | 2.35                 | 0.4923  | 3.11                 | 0.4453  |
| miR-15b-5p  | 1.11                | 0.6061  | -1.22                | 0.3472  | 1.07                 | 0.6796  | -1.46                | 0.3598  |
| miR-16-5p   | 1.11                | 0.7407  | -1.25                | 0.4948  | 1.66                 | 0.3019  | 1.59                 | 0.0647  |
| miR-17-5p   | 1.03                | 0.9526  | -1.38                | 0.5086  | 1.20                 | 0.6253  | 1.14                 | 0.7624  |
| miR-181a-5p | 1.08                | 0.8842  | -1.13                | 0.9869  | 1.33                 | 0.9546  | 1.32                 | 0.9527  |
| miR-181b-5p | -1.09               | 0.9555  | 1.20                 | 0.7281  | -1.45                | 0.3278  | -1.64                | 0.1442  |
| miR-181c-5p | 1.41                | 0.7011  | -1.04                | 0.7176  | 1.50                 | 0.8053  | 1.35                 | 0.9596  |
| miR-181d-5p | -1.24               | 0.6343  | 1.00                 | 0.8268  | -1.47                | 0.3236  | -2.11                | 0.0874  |
| miR-182-5p  | 1.83                | 0.4975  | 2.89                 | 0.2371  | 1.52                 | 0.7322  | -1.04                | 0.5491  |
| miR-186-5p  | 1.27                | 0.6001  | 1.16                 | 0.8061  | 1.93                 | 0.2396  | 2.02                 | 0.1234  |
| miR-195a-5p | 1.20                | 0.6483  | -1.11                | 0.7966  | 2.06                 | 0.0850  | 1.92                 | 0.2148  |
| miR-19a-3p  | 1.21                | 0.9892  | 1.13                 | 0.9659  | 1.54                 | 0.6247  | 1.37                 | 0.8799  |
| miR-19b-3p  | 1.07                | 0.8613  | 1.03                 | 0.8997  | 1.76                 | 0.5421  | 1.31                 | 0.9979  |
| miR-200c-3p | 1.14                | 0.7544  | 1.44                 | 0.5834  | 1.31                 | 0.7115  | -1.44                | 0.2596  |
| miR-20a-5p  | 1.13                | 0.7788  | -1.24                | 0.5830  | 1.27                 | 0.5493  | 1.09                 | 0.9424  |
| miR-20b-5p  | 1.11                | 0.6474  | -1.45                | 0.2390  | 1.55                 | 0.3332  | 1.45                 | 0.2128  |
| miR-221-3p  | -1.27               | 0.3823  | -1.93                | 0.2220  | -1.70                | 0.0239  | -1.60                | 0.5085  |
| miR-222-3p  | 1.20                | 0.4276  | 1.30                 | 0.4888  | 1.69                 | 0.1477  | 1.33                 | 0.2591  |
| miR-23a-3p  | 1.24                | 0.5976  | 1.36                 | 0.4801  | 1.36                 | 0.5421  | 1.12                 | 0.4810  |
| miR-23b-3p  | 1.16                | 0.6596  | 1.17                 | 0.5772  | 1.17                 | 0.7326  | 1.12                 | 0.5756  |
| miR-26a-5p  | 1.39                | 0.4762  | 1.40                 | 0.4634  | 1.24                 | 0.5322  | 1.34                 | 0.4297  |
| miR-26b-5p  | -1.06               | 0.9860  | -1.24                | 0.9411  | -1.12                | 0.7641  | 1.15                 | 0.6169  |
| miR-27a-3p  | 1.12                | 0.6674  | 1.25                 | 0.5462  | 2.15                 | 0.1395  | 2.25                 | 0.1876  |
| miR-27b-3p  | 1.15                | 0.6621  | 1.00                 | 0.9103  | 1.49                 | 0.3823  | 1.59                 | 0.3284  |
| miR-291a-3p | 1.29                | 0.6757  | 2.27                 | 0.3761  | 1.67                 | 0.4112  | 2.54                 | 0.1124  |

|             |       |        |       |        |       |        |       |        |
|-------------|-------|--------|-------|--------|-------|--------|-------|--------|
| miR-294-3p  | 2.99  | 0.0755 | 3.11  | 0.0336 | 2.91  | 0.0075 | 2.54  | 0.0013 |
| miR-295-3p  | -1.31 | 0.8944 | 1.06  | 0.8158 | -2.06 | 0.0619 | -1.64 | 0.3176 |
| miR-29a-3p  | 1.08  | 0.9691 | 1.38  | 0.5798 | 1.92  | 0.3752 | 2.40  | 0.0234 |
| miR-29b-3p  | -1.17 | 0.6712 | 1.21  | 0.8733 | 1.72  | 0.6550 | 3.24  | 0.5682 |
| miR-29c-3p  | 1.32  | 0.4925 | 1.14  | 0.5936 | 1.75  | 0.2697 | 2.88  | 0.0005 |
| miR-301a-3p | 1.10  | 0.9119 | 1.58  | 0.8811 | 1.36  | 0.7978 | -1.23 | 0.8012 |
| miR-301b-3p | -1.00 | 0.8133 | 1.29  | 0.8819 | 1.06  | 0.9834 | -1.64 | 0.5345 |
| miR-302b-3p | -1.19 | 0.9557 | 1.91  | 0.1780 | -1.05 | 0.9822 | -1.04 | 0.9532 |
| miR-302d-3p | 1.13  | 0.5771 | 1.14  | 0.6670 | 1.46  | 0.3999 | 1.12  | 0.6187 |
| miR-30a-5p  | 1.04  | 0.7539 | 1.16  | 0.5715 | 1.55  | 0.1021 | 1.77  | 0.1653 |
| miR-30b-5p  | 1.00  | 0.8925 | 1.00  | 0.7983 | 1.75  | 0.1579 | 1.81  | 0.2600 |
| miR-30c-5p  | -1.04 | 0.9466 | 1.01  | 0.7700 | 1.38  | 0.1849 | 1.04  | 0.6168 |
| miR-30d-5p  | -1.15 | 0.3888 | 1.12  | 0.6162 | 1.33  | 0.2501 | 1.62  | 0.1528 |
| miR-30e-5p  | 1.22  | 0.4936 | 1.12  | 0.7221 | 1.83  | 0.1751 | 1.75  | 0.1775 |
| miR-322-5p  | -1.03 | 0.8470 | 1.73  | 0.3329 | 1.37  | 0.3715 | 1.30  | 0.4477 |
| miR-325-3p  | -1.19 | 0.9557 | 1.67  | 0.3468 | -1.34 | 0.4404 | -1.04 | 0.9532 |
| miR-338-5p  | 1.11  | 0.7981 | 1.53  | 0.4134 | 1.09  | 0.9545 | 1.16  | 0.7965 |
| miR-340-5p  | 1.05  | 0.6783 | 1.08  | 0.5701 | 1.20  | 0.3979 | 1.67  | 0.0772 |
| miR-350-3p  | 1.04  | 0.7134 | 1.06  | 0.6451 | 1.23  | 0.3666 | 1.16  | 0.5043 |
| miR-369-3p  | 1.21  | 0.6266 | 1.31  | 0.9744 | 1.15  | 0.6222 | 1.97  | 0.3333 |
| miR-384-5p  | -1.19 | 0.9557 | 1.67  | 0.3468 | -1.34 | 0.4404 | -1.04 | 0.9532 |
| miR-410-3p  | 1.66  | 0.2505 | 2.18  | 0.1515 | 1.89  | 0.0505 | 2.10  | 0.0091 |
| miR-429-3p  | -1.17 | 0.8147 | 1.20  | 0.5397 | 1.22  | 0.4967 | 1.25  | 0.4512 |
| miR-466d-3p | 1.21  | 0.7268 | 1.76  | 0.5170 | 1.38  | 0.9989 | 1.17  | 0.8057 |
| miR-466k    | 1.19  | 0.6417 | 1.34  | 0.4841 | 1.20  | 0.6037 | 2.28  | 0.2241 |
| miR-495-3p  | -1.00 | 0.5835 | -1.28 | 0.4540 | 1.08  | 0.9786 | 1.63  | 0.6259 |
| miR-497a-5p | 1.54  | 0.2460 | 1.19  | 0.5227 | 1.33  | 0.5579 | 1.87  | 0.0480 |
| miR-568     | 1.10  | 0.7735 | 1.96  | 0.2428 | -1.11 | 0.5850 | 1.37  | 0.5412 |
| miR-590-3p  | 1.00  | 0.8191 | 2.41  | 0.2668 | -1.13 | 0.5664 | -1.04 | 0.9532 |
| miR-669h-3p | 1.64  | 0.5478 | 1.90  | 0.4714 | 1.48  | 0.7262 | 2.40  | 0.2020 |
| miR-669k-3p | 1.25  | 0.6731 | 1.98  | 0.2806 | 1.27  | 0.5789 | 1.48  | 0.4194 |
| miR-694     | -1.69 | 0.2586 | -2.36 | 0.0345 | -1.90 | 0.1216 | -2.20 | 0.0696 |
| miR-712-5p  | -1.32 | 0.9230 | -1.51 | 0.9969 | -1.22 | 0.4622 | 1.21  | 0.9068 |
| miR-721     | 4.16  | 0.2736 | 5.06  | 0.2738 | 3.96  | 0.1231 | 4.51  | 0.0396 |
| miR-743a-3p | -1.14 | 0.8515 | 1.36  | 0.3648 | -1.26 | 0.4002 | 1.16  | 0.5971 |
| miR-743b-3p | -1.19 | 0.9557 | 1.67  | 0.3468 | -1.34 | 0.4404 | -1.04 | 0.9532 |
| miR-876-3p  | -1.19 | 0.9557 | 1.67  | 0.3468 | -1.34 | 0.4404 | -1.04 | 0.9532 |
| miR-9-5p    | 1.51  | 0.6132 | 2.38  | 0.3937 | 1.57  | 0.6698 | 1.01  | 0.6005 |
| miR-93-5p   | 1.04  | 0.9637 | 1.03  | 0.9249 | 1.11  | 0.8823 | 1.12  | 0.9534 |
| miR-98-5p   | -1.28 | 0.9754 | 1.02  | 0.9741 | -1.34 | 0.5357 | -1.47 | 0.4957 |

S2 Table: Macrophage miRNA regulation during *La-arg<sup>-</sup> L. (L.) amazonensis* infection. Fold (Fold regulation) represents the fold change results at a biological magnitude. Values > 1 indicate positive regulation. and values < 1 indicate negative regulation.

| Mature ID   | <i>La-arg<sup>-</sup> - 4h</i> |         | <i>La-arg<sup>-</sup> - 12h</i> |         | <i>La-arg<sup>-</sup> - 24h</i> |         | <i>La-arg<sup>-</sup> - 48h</i> |         |
|-------------|--------------------------------|---------|---------------------------------|---------|---------------------------------|---------|---------------------------------|---------|
|             | Fold                           | p-value | Fold                            | p-value | Fold                            | p-value | Fold                            | p-value |
| let-7a-5p   | -1.27                          | 0.4881  | -1.13                           | 0.4627  | -1.37                           | 0.4559  | -1.49                           | 0.4359  |
| let-7b-5p   | -1.96                          | 0.2567  | -2.29                           | 0.1065  | -1.49                           | 0.4624  | -1.74                           | 0.3115  |
| let-7c-5p   | -1.80                          | 0.2802  | -2.30                           | 0.0755  | -1.60                           | 0.3570  | -1.48                           | 0.4258  |
| let-7d-5p   | -1.31                          | 0.5498  | -1.54                           | 0.0604  | -1.33                           | 0.4466  | -1.46                           | 0.2943  |
| let-7e-5p   | -1.10                          | 0.9761  | -1.38                           | 0.2765  | -1.16                           | 0.8751  | -1.15                           | 0.8578  |
| let-7f-5p   | 1.47                           | 0.6533  | -1.09                           | 0.4723  | 1.12                            | 0.9061  | 1.41                            | 0.6544  |
| let-7g-5p   | 1.55                           | 0.3546  | -1.26                           | 0.3493  | 1.10                            | 0.7145  | 1.06                            | 0.7168  |
| let-7i-5p   | -1.11                          | 0.9611  | -1.75                           | 0.0027  | -1.41                           | 0.8571  | -1.29                           | 0.9989  |
| miR-106a-5p | 1.12                           | 0.9423  | -1.73                           | 0.1395  | -1.47                           | 0.5038  | -1.91                           | 0.3428  |
| miR-106b-5p | -1.03                          | 0.6969  | -1.52                           | 0.3139  | -1.29                           | 0.5723  | -1.62                           | 0.3948  |
| miR-1192    | 1.42                           | 0.5706  | -1.41                           | 0.2721  | -1.07                           | 0.7448  | 1.48                            | 0.4970  |
| miR-126a-5p | 2.02                           | 0.3208  | 1.81                            | 0.3038  | -1.33                           | 0.6904  | -4.52                           | 0.1012  |
| miR-128-3p  | 1.29                           | 0.4639  | -1.35                           | 0.2808  | -1.31                           | 0.6001  | -1.21                           | 0.8095  |
| miR-130a-3p | -1.36                          | 0.4806  | -1.77                           | 0.2866  | -1.62                           | 0.4248  | -1.17                           | 0.5606  |
| miR-130b-3p | -1.16                          | 0.5467  | -3.06                           | 0.1005  | -1.63                           | 0.2675  | -1.76                           | 0.2139  |
| miR-135a-5p | -1.03                          | 0.8509  | -1.46                           | 0.2316  | -2.59                           | 0.2358  | -1.77                           | 0.4537  |
| miR-140-5p  | 1.07                           | 0.9009  | -2.50                           | 0.1236  | -1.05                           | 0.8691  | -1.05                           | 0.7823  |
| miR-144-3p  | -1.39                          | 0.0407  | -2.78                           | 0.0003  | -2.09                           | 0.0202  | -1.95                           | 0.0344  |
| miR-155-5p  | -1.35                          | 0.4753  | -1.44                           | 0.3660  | -2.19                           | 0.3587  | -2.54                           | 0.3410  |
| miR-15a-5p  | -1.89                          | 0.3953  | -3.45                           | 0.2340  | -1.41                           | 0.6710  | -1.77                           | 0.4412  |
| miR-15b-5p  | 1.23                           | 0.3280  | -1.22                           | 0.0947  | -1.28                           | 0.3271  | -1.44                           | 0.1113  |
| miR-16-5p   | 1.21                           | 0.5283  | -1.12                           | 0.6741  | 1.14                            | 0.7267  | 1.03                            | 0.9660  |
| miR-17-5p   | 1.20                           | 0.6875  | -1.83                           | 0.1062  | -1.56                           | 0.3718  | -1.82                           | 0.2786  |
| miR-181a-5p | -1.18                          | 0.5619  | -1.31                           | 0.3991  | -1.30                           | 0.4962  | -1.29                           | 0.5057  |
| miR-181b-5p | -1.44                          | 0.3646  | -1.54                           | 0.1774  | -2.17                           | 0.1432  | -2.19                           | 0.1639  |
| miR-181c-5p | 1.03                           | 0.7082  | -1.26                           | 0.4120  | -1.03                           | 0.6919  | -1.21                           | 0.5190  |
| miR-181d-5p | -1.52                          | 0.3074  | -1.54                           | 0.1662  | -2.02                           | 0.1628  | -2.06                           | 0.1769  |
| miR-182-5p  | 1.40                           | 0.4569  | 2.81                            | 0.1868  | 1.61                            | 0.7920  | -1.39                           | 0.6114  |
| miR-186-5p  | 1.17                           | 0.8141  | -1.86                           | 0.1151  | 1.11                            | 0.8023  | -1.02                           | 0.9688  |
| miR-195a-5p | 1.44                           | 0.3809  | -1.12                           | 0.6262  | 1.36                            | 0.5238  | 1.35                            | 0.5108  |
| miR-19a-3p  | -1.95                          | 0.3733  | -3.49                           | 0.2123  | -1.72                           | 0.4576  | -2.82                           | 0.3141  |
| miR-19b-3p  | -2.11                          | 0.3608  | -4.45                           | 0.1948  | -2.01                           | 0.4303  | -2.97                           | 0.3120  |
| miR-200c-3p | 1.46                           | 0.5651  | 1.73                            | 0.2046  | 1.07                            | 0.9904  | 1.06                            | 0.9177  |
| miR-20a-5p  | -1.09                          | 0.6507  | -1.62                           | 0.1542  | -1.43                           | 0.5827  | -1.82                           | 0.2892  |
| miR-20b-5p  | -1.13                          | 0.7408  | -2.85                           | 0.0598  | -1.58                           | 0.6387  | -2.16                           | 0.3621  |
| miR-221-3p  | -1.31                          | 0.1347  | -1.43                           | 0.0379  | -2.57                           | 0.0130  | -2.44                           | 0.0355  |
| miR-222-3p  | -1.32                          | 0.1957  | -1.43                           | 0.0940  | -1.04                           | 0.7316  | -1.02                           | 0.9696  |
| miR-23a-3p  | 2.20                           | 0.0891  | 1.14                            | 0.9111  | 1.40                            | 0.4986  | 1.30                            | 0.5772  |
| miR-23b-3p  | 1.38                           | 0.4776  | 1.08                            | 0.9985  | 1.07                            | 0.9732  | 1.38                            | 0.4723  |
| miR-26a-5p  | 2.06                           | 0.0280  | 1.13                            | 0.7312  | 1.18                            | 0.6467  | 1.56                            | 0.2778  |
| miR-26b-5p  | 1.18                           | 0.8409  | -1.81                           | 0.1344  | -1.24                           | 0.9406  | 1.10                            | 0.8707  |
| miR-27a-3p  | 1.20                           | 0.5850  | -1.81                           | 0.0603  | 1.15                            | 0.5766  | 1.22                            | 0.5519  |



|             |       |        |       |        |       |        |       |        |
|-------------|-------|--------|-------|--------|-------|--------|-------|--------|
| miR-27b-3p  | 1.33  | 0.4735 | -1.56 | 0.1930 | -1.01 | 0.7725 | -1.03 | 0.7317 |
| miR-291a-3p | 1.14  | 0.7421 | 1.29  | 0.8269 | -1.20 | 0.5789 | 1.06  | 0.9486 |
| miR-294-3p  | 2.00  | 0.1646 | 2.89  | 0.0265 | 2.33  | 0.1660 | 1.14  | 0.3988 |
| miR-295-3p  | -1.12 | 0.5291 | -2.24 | 0.0168 | -1.68 | 0.1539 | -1.57 | 0.2078 |
| miR-29a-3p  | 1.11  | 0.9316 | -2.55 | 0.1141 | -1.05 | 0.9576 | -1.16 | 0.8368 |
| miR-29b-3p  | -2.08 | 0.3969 | -4.98 | 0.2476 | -2.13 | 0.4364 | -1.94 | 0.4145 |
| miR-29c-3p  | 1.04  | 0.9550 | -3.19 | 0.0234 | -1.26 | 0.9880 | -1.15 | 0.9952 |
| miR-301a-3p | -1.57 | 0.4899 | -2.06 | 0.2956 | -1.70 | 0.4172 | -2.92 | 0.3293 |
| miR-301b-3p | -1.72 | 0.4611 | -1.95 | 0.3297 | -2.01 | 0.3761 | -2.61 | 0.3386 |
| miR-302b-3p | 1.42  | 0.5706 | 5.39  | 0.2108 | -1.07 | 0.7448 | 1.59  | 0.4445 |
| miR-302d-3p | -2.87 | 0.0494 | -1.11 | 0.8629 | -1.40 | 0.3678 | -1.34 | 0.4052 |
| miR-30a-5p  | 1.26  | 0.2468 | -1.52 | 0.0536 | 1.08  | 0.6795 | 1.25  | 0.3998 |
| miR-30b-5p  | 1.23  | 0.5094 | -1.89 | 0.0382 | 1.19  | 0.5817 | 1.19  | 0.5732 |
| miR-30c-5p  | 1.37  | 0.2843 | -1.26 | 0.2612 | 1.11  | 0.7080 | 1.21  | 0.5440 |
| miR-30d-5p  | 1.07  | 0.7146 | -1.44 | 0.0409 | -1.01 | 0.9060 | 1.03  | 0.7728 |
| miR-30e-5p  | 1.14  | 0.6872 | -1.20 | 0.3670 | 1.10  | 0.7707 | 1.15  | 0.6685 |
| miR-322-5p  | 1.11  | 0.7248 | -2.54 | 0.0299 | 1.20  | 0.5802 | -1.30 | 0.8874 |
| miR-325-3p  | 1.42  | 0.5706 | -1.41 | 0.2721 | 1.26  | 0.8202 | 1.00  | 0.8471 |
| miR-338-5p  | -1.04 | 0.9051 | 1.09  | 0.9650 | -1.09 | 0.6855 | 1.08  | 0.9882 |
| miR-340-5p  | -1.60 | 0.5224 | -4.90 | 0.0111 | -2.40 | 0.7433 | -2.51 | 0.7208 |
| miR-350-3p  | 1.18  | 0.4852 | -1.60 | 0.0497 | 1.01  | 0.8766 | 1.07  | 0.6657 |
| miR-369-3p  | 1.69  | 0.9093 | -1.13 | 0.3998 | 1.61  | 0.6058 | 1.94  | 0.5248 |
| miR-384-5p  | 1.42  | 0.5706 | -1.41 | 0.2721 | -1.07 | 0.7448 | 1.00  | 0.8471 |
| miR-410-3p  | 1.11  | 0.7553 | 1.75  | 0.1538 | -1.09 | 0.7448 | -1.58 | 0.2186 |
| miR-429-3p  | 1.15  | 0.6360 | -1.36 | 0.1467 | -1.06 | 0.9943 | 1.20  | 0.5614 |
| miR-466d-3p | 1.19  | 0.8139 | -1.45 | 0.3863 | 1.02  | 0.6766 | 1.06  | 0.7236 |
| miR-466k    | -2.38 | 0.1621 | -4.70 | 0.0106 | -1.48 | 0.2968 | -1.89 | 0.2376 |
| miR-495-3p  | -1.48 | 0.4217 | -2.22 | 0.2426 | -1.50 | 0.4315 | -1.85 | 0.3383 |
| miR-497a-5p | -1.10 | 0.8061 | -2.21 | 0.1050 | -1.96 | 0.7867 | -2.21 | 0.1904 |
| miR-568     | 1.39  | 0.5786 | -1.19 | 0.5424 | 1.27  | 0.7655 | -1.02 | 0.8287 |
| miR-590-3p  | 1.42  | 0.5706 | -1.41 | 0.2721 | -1.07 | 0.7448 | 1.00  | 0.8471 |
| miR-669h-3p | -1.16 | 0.5954 | -1.36 | 0.3733 | -1.45 | 0.4502 | -1.91 | 0.3190 |
| miR-669k-3p | 2.83  | 0.0276 | 2.14  | 0.0837 | 1.61  | 0.3316 | 1.95  | 0.1005 |
| miR-694     | -3.19 | 0.0334 | -3.90 | 0.0005 | -2.81 | 0.1276 | -3.29 | 0.0164 |
| miR-712-5p  | -2.61 | 0.2233 | -1.81 | 0.2229 | -1.16 | 0.5301 | -1.04 | 0.5613 |
| miR-721     | 2.44  | 0.1167 | 1.38  | 0.5460 | 3.06  | 0.3321 | 1.03  | 0.8722 |
| miR-743a-3p | 1.11  | 0.7925 | -1.80 | 0.0641 | 1.06  | 0.9217 | -1.23 | 0.6255 |
| miR-743b-3p | 1.42  | 0.5706 | -1.41 | 0.2721 | -1.07 | 0.7448 | 1.00  | 0.8471 |
| miR-876-3p  | 1.42  | 0.5706 | -1.41 | 0.2721 | -1.07 | 0.7448 | 1.00  | 0.8471 |
| miR-9-5p    | 2.64  | 0.0735 | 1.59  | 0.5085 | 1.48  | 0.7924 | 1.55  | 0.6411 |
| miR-93-5p   | 1.22  | 0.7720 | -1.10 | 0.5455 | -1.20 | 0.5168 | -1.21 | 0.5308 |
| miR-98-5p   | 1.29  | 0.9597 | -1.43 | 0.3352 | -1.70 | 0.3962 | -1.53 | 0.4946 |

**S3 Table: In silico analysis of predicted miR-294 mRNA targets.** Prediction analysis of miR-294 binding sequences in the 3' UTR of mRNA targets using the miRWalk software.

| Gene Name      | RefSeqID     | Seed Length | Start | Sequence       | End  | Region | Pvalue |
|----------------|--------------|-------------|-------|----------------|------|--------|--------|
| Wnt9b          | NM_011719    | 14          | 1607  | AAAGUGCUUCCCUU | 1620 | 3 UTR  | 0.0000 |
| Paf1           | NM_019458    | 13          | 1868  | AAAGUGCUUCCCU  | 1880 | 3 UTR  | 0.0000 |
| Gtf3a          | NM_025652    | 12          | 626   | AAAGUGCUUCCC   | 637  | 3 UTR  | 0.0001 |
| Zfp367         | NM_175494    | 11          | 1536  | AAAGUGCUUCC    | 1546 | 3 UTR  | 0.0005 |
| Il25           | NM_080729    | 11          | 681   | AAAGUGCUUCC    | 691  | 3 UTR  | 0.0001 |
| 1200015N20Rik  | NM_024244    | 11          | 2000  | AAAGUGCUUCC    | 2010 | 3 UTR  | 0.0003 |
| Il6st          | NM_010560    | 11          | 3840  | AAAGUGCUUCC    | 3850 | 3 UTR  | 0.0006 |
| 6030436E02Rik  | NM_194340    | 11          | 2262  | AAAGUGCUUCC    | 2272 | 3 UTR  | 0.0010 |
| Rdh1           | NM_080436    | 11          | 2718  | AAAGUGCUUCC    | 2728 | 3 UTR  | 0.0007 |
| lws1           | NM_173441    | 11          | 8720  | AAAGUGCUUCC    | 8730 | 3 UTR  | 0.0017 |
| Tyw1           | NM_178897    | 11          | 2539  | AAAGUGCUUCC    | 2549 | 3 UTR  | 0.0008 |
| Tbxas1         | NM_011539    | 11          | 1792  | AAAGUGCUUCC    | 1802 | 3 UTR  | 0.0001 |
| Mkrn1          | NM_018810    | 10          | 2910  | AAAGUGCUUC     | 2919 | 3 UTR  | 0.0013 |
| Zfp560         | NM_001004190 | 10          | 3592  | AAAGUGCUUC     | 3601 | 3 UTR  | 0.0021 |
| Serpine1       | NM_008871    | 10          | 2104  | AAAGUGCUUC     | 2113 | 3 UTR  | 0.0016 |
| Reps2          | NM_178256    | 10          | 5006  | AAAGUGCUUC     | 5015 | 3 UTR  | 0.0053 |
| Zfp280b        | NM_177475    | 10          | 3136  | AAAGUGCUUC     | 3145 | 3 UTR  | 0.0029 |
| Irak2          | NM_172161    | 10          | 2790  | AAAGUGCUUC     | 2799 | 3 UTR  | 0.0012 |
| Wrb            | NM_207301    | 10          | 1468  | AAAGUGCUUC     | 1477 | 3 UTR  | 0.0018 |
| Grhl2          | NM_026496    | 10          | 3497  | AAAGUGCUUC     | 3506 | 3 UTR  | 0.0026 |
| Ythdf3         | NM_172677    | 10          | 2257  | AAAGUGCUUC     | 2266 | 3 UTR  | 0.0028 |
| Nhlrc1         | NM_175340    | 10          | 2179  | AAAGUGCUUC     | 2188 | 3 UTR  | 0.0010 |
| Zc3h14         | NM_029334    | 10          | 2714  | AAAGUGCUUC     | 2723 | 3 UTR  | 0.0011 |
| Sar1b          | NM_025535    | 10          | 985   | AAAGUGCUUC     | 994  | 3 UTR  | 0.0005 |
| Stox2          | NM_175162    | 10          | 6276  | AAAGUGCUUC     | 6285 | 3 UTR  | 0.0062 |
| Lamp2          | NM_001017959 | 10          | 1472  | AAAGUGCUUC     | 1481 | 3 UTR  | 0.0004 |
| Aox3l1         | NM_001008419 | 10          | 4366  | AAAGUGCUUC     | 4375 | 3 UTR  | 0.0006 |
| Arhgef7        | NM_017402    | 10          | 4265  | AAAGUGCUUC     | 4274 | 3 UTR  | 0.0020 |
| Tshz3          | NM_172298    | 10          | 3770  | AAAGUGCUUC     | 3779 | 3 UTR  | 0.0015 |
| 4932425I24Rik  | NM_001081025 | 10          | 2575  | AAAGUGCUUC     | 2584 | 3 UTR  | 0.0003 |
| Hn1            | NM_008258    | 10          | 670   | AAAGUGCUUC     | 679  | 3 UTR  | 0.0008 |
| Ldoc1          | NM_001018087 | 10          | 951   | AAAGUGCUUC     | 960  | 3 UTR  | 0.0008 |
| Cxcr6          | NM_030712    | 10          | 1348  | AAAGUGCUUC     | 1357 | 3 UTR  | 0.0007 |
| Derl2          | NM_033562    | 10          | 869   | AAAGUGCUUC     | 878  | 3 UTR  | 0.0027 |
| Pacs2          | NM_001081170 | 10          | 4750  | AAAGUGCUUC     | 4759 | 3 UTR  | 0.0026 |
| Rgma           | NM_177740    | 10          | 3415  | AAAGUGCUUC     | 3424 | 3 UTR  | 0.0018 |
| Rabgap1        | NM_146121    | 10          | 3866  | AAAGUGCUUC     | 3875 | 3 UTR  | 0.0015 |
| Ano6           | NM_175344    | 10          | 2898  | AAAGUGCUUC     | 2907 | 3 UTR  | 0.0020 |
| Ghsr           | NM_177330    | 10          | 2975  | AAAGUGCUUC     | 2984 | 3 UTR  | 0.0029 |
| Tsr1           | NM_177325    | 10          | 3355  | AAAGUGCUUC     | 3364 | 3 UTR  | 0.0009 |
| Arv1           | NM_026855    | 10          | 1106  | AAAGUGCUUC     | 1115 | 3 UTR  | 0.0003 |
| Ica1l          | NM_027407    | 10          | 2936  | AAAGUGCUUC     | 2945 | 3 UTR  | 0.0020 |
| Rgl1           | NM_016846    | 10          | 3797  | AAAGUGCUUC     | 3806 | 3 UTR  | 0.0014 |
| Slc22a23       | NM_001033167 | 10          | 2721  | AAAGUGCUUC     | 2730 | 3 UTR  | 0.0036 |
| Snx8           | NM_172277    | 10          | 2552  | AAAGUGCUUC     | 2561 | 3 UTR  | 0.0012 |
| Stk11          | NM_011492    | 10          | 1514  | AAAGUGCUUC     | 1523 | 3 UTR  | 0.0002 |
| Plekha7        | NM_172743    | 10          | 3852  | AAAGUGCUUC     | 3861 | 3 UTR  | 0.0006 |
| Nos2           | NM_010927    | 10          | 3904  | AAAGUGCUUC     | 3913 | 3 UTR  | 0.0004 |
| Nxph2          | NM_008752    | 10          | 1581  | AAAGUGCUUC     | 1590 | 3 UTR  | 0.0015 |
| Slc16a9        | NM_025807    | 10          | 3171  | AAAGUGCUUC     | 3180 | 3 UTR  | 0.0018 |
| Cry2           | NM_009963    | 10          | 3897  | AAAGUGCUUC     | 3906 | 3 UTR  | 0.0021 |
| Gda            | NM_010266    | 10          | 3131  | AAAGUGCUUC     | 3140 | 3 UTR  | 0.0037 |
| Pak7           | NM_172858    | 9           | 3051  | AAAGUGCUU      | 3059 | 3 UTR  | 0.0081 |
| Tiam2          | NM_011878    | 9           | 5994  | AAAGUGCUU      | 6002 | 3 UTR  | 0.0026 |
| Phf6           | NM_027642    | 9           | 3239  | AAAGUGCUU      | 3247 | 3 UTR  | 0.0117 |
| St6galnac2     | NM_009180    | 9           | 1254  | AAAGUGCUU      | 1262 | 3 UTR  | 0.0031 |
| Eda            | NM_010099    | 9           | 3101  | AAAGUGCUU      | 3109 | 3 UTR  | 0.0137 |
| AC129021.4-202 | NM_001081217 | 9           | 2570  | AAAGUGCUU      | 2578 | 3 UTR  | 0.0154 |
| Elovl6         | NM_130450    | 9           | 3455  | AAAGUGCUU      | 3463 | 3 UTR  | 0.0189 |

|               |              |   |       |           |       |       |        |
|---------------|--------------|---|-------|-----------|-------|-------|--------|
| Ubfd1         | NM_138589    | 9 | 1193  | AAAGUGCUU | 1201  | 3 UTR | 0.0138 |
| Ubxn2b        | NM_026534    | 9 | 3169  | AAAGUGCUU | 3177  | 3 UTR | 0.0141 |
| Gtf2h2        | NM_022011    | 9 | 1446  | AAAGUGCUU | 1454  | 3 UTR | 0.0013 |
| Pappa         | NM_021362    | 9 | 7309  | AAAGUGCUU | 7317  | 3 UTR | 0.0218 |
| Wdr60         | NM_146039    | 9 | 3482  | AAAGUGCUU | 3490  | 3 UTR | 0.0022 |
| Rs1           | NM_011302    | 9 | 942   | AAAGUGCUU | 950   | 3 UTR | 0.0189 |
| Rock2         | NM_009072    | 9 | 7286  | AAAGUGCUU | 7294  | 3 UTR | 0.0138 |
| App           | NM_007471    | 9 | 2960  | AAAGUGCUU | 2968  | 3 UTR | 0.0035 |
| Ccnd2         | NM_009829    | 9 | 2132  | AAAGUGCUU | 2140  | 3 UTR | 0.0175 |
| Lypd6         | NM_177139    | 9 | 2570  | AAAGUGCUU | 2578  | 3 UTR | 0.0106 |
| Syap1         | NM_025932    | 9 | 1657  | AAAGUGCUU | 1665  | 3 UTR | 0.0039 |
| Hrbl          | NM_178162    | 9 | 2147  | AAAGUGCUU | 2155  | 3 UTR | 0.0035 |
| Rab22a        | NM_024436    | 9 | 1312  | AAAGUGCUU | 1320  | 3 UTR | 0.0040 |
| Map3k14       | NM_016896    | 9 | 3751  | AAAGUGCUU | 3759  | 3 UTR | 0.0048 |
| G6pc          | NM_008061    | 9 | 2172  | AAAGUGCUU | 2180  | 3 UTR | 0.0042 |
| Slc24a2       | NM_172426    | 9 | 7281  | AAAGUGCUU | 7289  | 3 UTR | 0.0309 |
| Ano5          | NM_177694    | 9 | 6557  | AAAGUGCUU | 6565  | 3 UTR | 0.0184 |
| Gpr157        | NM_177366    | 9 | 3667  | AAAGUGCUU | 3675  | 3 UTR | 0.0133 |
| Rpe           | NM_025683    | 9 | 1652  | AAAGUGCUU | 1660  | 3 UTR | 0.0073 |
| Magi3         | NM_133853    | 9 | 3671  | AAAGUGCUU | 3679  | 3 UTR | 0.0032 |
| Tollip        | NM_023764    | 9 | 2405  | AAAGUGCUU | 2413  | 3 UTR | 0.0106 |
| Usp29         | NM_021323    | 9 | 5302  | AAAGUGCUU | 5310  | 3 UTR | 0.0131 |
| Col17a1       | NM_007732    | 9 | 5378  | AAAGUGCUU | 5386  | 3 UTR | 0.0033 |
| Slc6a15       | NM_175328    | 9 | 2865  | AAAGUGCUU | 2873  | 3 UTR | 0.0039 |
| Helb          | NM_080446    | 9 | 4339  | AAAGUGCUU | 4347  | 3 UTR | 0.0046 |
| Pld5          | NM_176916    | 9 | 3557  | AAAGUGCUU | 3565  | 3 UTR | 0.0058 |
| Zfp800        | NM_001081678 | 9 | 2870  | AAAGUGCUU | 2878  | 3 UTR | 0.0066 |
| Ift88         | NM_009376    | 9 | 2814  | AAAGUGCUU | 2822  | 3 UTR | 0.0018 |
| Iqck          | NM_001081446 | 9 | 1000  | AAAGUGCUU | 1008  | 3 UTR | 0.0044 |
| Lhx6          | NM_001083125 | 9 | 3256  | AAAGUGCUU | 3264  | 3 UTR | 0.0078 |
| Pcdh7         | NM_018764    | 9 | 4863  | AAAGUGCUU | 4871  | 3 UTR | 0.0050 |
| Col19a1       | NM_007733    | 9 | 10521 | AAAGUGCUU | 10529 | 3 UTR | 0.0264 |
| Cdca7         | NM_025866    | 9 | 1529  | AAAGUGCUU | 1537  | 3 UTR | 0.0043 |
| Rbl1          | NM_011249    | 9 | 3292  | AAAGUGCUU | 3300  | 3 UTR | 0.0062 |
| Lpgat1        | NM_172266    | 9 | 2976  | AAAGUGCUU | 2984  | 3 UTR | 0.0216 |
| Tmed8         | NM_001033475 | 9 | 5597  | AAAGUGCUU | 5605  | 3 UTR | 0.0233 |
| Calb1         | NM_009788    | 9 | 2237  | AAAGUGCUU | 2245  | 3 UTR | 0.0074 |
| 6430573F11Rik | NM_176952    | 9 | 1522  | AAAGUGCUU | 1530  | 3 UTR | 0.0016 |
| Tmub2         | NM_028076    | 9 | 1648  | AAAGUGCUU | 1656  | 3 UTR | 0.0038 |
| Uhrf1bp1      | NM_001080769 | 9 | 6693  | AAAGUGCUU | 6701  | 3 UTR | 0.0153 |
| Unk           | NM_172569    | 9 | 2713  | AAAGUGCUU | 2721  | 3 UTR | 0.0046 |
| Slc25a40      | NM_178766    | 9 | 2551  | AAAGUGCUU | 2559  | 3 UTR | 0.0057 |
| Jazf1         | NM_173406    | 9 | 1645  | AAAGUGCUU | 1653  | 3 UTR | 0.0054 |
| Mga           | NM_013720    | 9 | 13449 | AAAGUGCUU | 13457 | 3 UTR | 0.0175 |
| Mink1         | NM_001045959 | 9 | 4700  | AAAGUGCUU | 4708  | 3 UTR | 0.0029 |
| Dnase1l3      | NM_007870    | 9 | 3435  | AAAGUGCUU | 3443  | 3 UTR | 0.0098 |
| C77080        | NM_001033189 | 9 | 3692  | AAAGUGCUU | 3700  | 3 UTR | 0.0071 |
| Cngb3         | NM_013927    | 9 | 2785  | AAAGUGCUU | 2793  | 3 UTR | 0.0096 |
| Hoxa1         | NM_010449    | 9 | 1824  | AAAGUGCUU | 1832  | 3 UTR | 0.0052 |
| Bpi           | NM_008325    | 9 | 2363  | AAAGUGCUU | 2371  | 3 UTR | 0.0046 |
| Mtf1          | NM_008636    | 9 | 5357  | AAAGUGCUU | 5365  | 3 UTR | 0.0206 |
| Mecp2         | NM_001081979 | 9 | 6475  | AAAGUGCUU | 6483  | 3 UTR | 0.0323 |
| Ankrd52       | NM_172790    | 9 | 6007  | AAAGUGCUU | 6015  | 3 UTR | 0.0125 |
| Dcun1d4       | NM_178896    | 9 | 1812  | AAAGUGCUU | 1820  | 3 UTR | 0.0118 |
| Nudt3         | NM_019837    | 9 | 991   | AAAGUGCUU | 999   | 3 UTR | 0.0053 |
| Lace1         | NM_145743    | 9 | 2036  | AAAGUGCUU | 2044  | 3 UTR | 0.0035 |
| Rgmb          | NM_178615    | 9 | 2026  | AAAGUGCUU | 2034  | 3 UTR | 0.0034 |
| Impg2         | NM_174876    | 9 | 4845  | AAAGUGCUU | 4853  | 3 UTR | 0.0115 |
| Sf3b1         | NM_031179    | 9 | 5519  | AAAGUGCUU | 5527  | 3 UTR | 0.0082 |
| Zdhhc8        | NM_172151    | 9 | 4417  | AAAGUGCUU | 4425  | 3 UTR | 0.0094 |
| lkbkg         | NM_178590    | 9 | 4261  | AAAGUGCUU | 4269  | 3 UTR | 0.0120 |
| F2rl2         | NM_010170    | 9 | 2154  | AAAGUGCUU | 2162  | 3 UTR | 0.0046 |
| Rb1cc1        | NM_009826    | 9 | 5851  | AAAGUGCUU | 5859  | 3 UTR | 0.0050 |

|                |              |   |      |           |      |       |        |
|----------------|--------------|---|------|-----------|------|-------|--------|
| Lmo3           | NM_207222    | 9 | 1327 | AAAGUGCUU | 1335 | 3 UTR | 0.0056 |
| Nkapl          | NM_025719    | 9 | 1347 | AAAGUGCUU | 1355 | 3 UTR | 0.0006 |
| Fyco1          | NM_148925    | 9 | 7576 | AAAGUGCUU | 7584 | 3 UTR | 0.0120 |
| Wdr37          | NM_001039388 | 9 | 2473 | AAAGUGCUU | 2481 | 3 UTR | 0.0108 |
| Ezh1           | NM_007970    | 9 | 3284 | AAAGUGCUU | 3292 | 3 UTR | 0.0069 |
| Il6ra          | NM_010559    | 9 | 1888 | AAAGUGCUU | 1896 | 3 UTR | 0.0070 |
| Cfl2           | NM_007688    | 9 | 1125 | AAAGUGCUU | 1133 | 3 UTR | 0.0088 |
| Atad2          | NM_027435    | 9 | 4516 | AAAGUGCUU | 4524 | 3 UTR | 0.0056 |
| Pdk4           | NM_013743    | 9 | 1856 | AAAGUGCUU | 1864 | 3 UTR | 0.0080 |
| Rassf2         | NM_175445    | 9 | 4589 | AAAGUGCUU | 4597 | 3 UTR | 0.0135 |
| Casc4          | NM_177054    | 9 | 2562 | AAAGUGCUU | 2570 | 3 UTR | 0.0101 |
| Mterfd2        | NM_178051    | 9 | 1137 | AAAGUGCUU | 1145 | 3 UTR | 0.0085 |
| Slc41a2        | NM_177388    | 9 | 3061 | AAAGUGCUU | 3069 | 3 UTR | 0.0092 |
| Pde3b          | NM_011055    | 9 | 3746 | AAAGUGCUU | 3754 | 3 UTR | 0.0065 |
| Trem1          | NM_021406    | 9 | 1889 | AAAGUGCUU | 1897 | 3 UTR | 0.0086 |
| AA881470       | NM_181066    | 9 | 3029 | AAAGUGCUU | 3037 | 3 UTR | 0.0028 |
| Itfg1          | NM_028007    | 9 | 2039 | AAAGUGCUU | 2047 | 3 UTR | 0.0013 |
| Eif2ak2        | NM_011163    | 9 | 4106 | AAAGUGCUU | 4114 | 3 UTR | 0.0098 |
| Tmem65         | NM_175212    | 9 | 2920 | AAAGUGCUU | 2928 | 3 UTR | 0.0100 |
| Mmp24          | NM_010808    | 9 | 3682 | AAAGUGCUU | 3690 | 3 UTR | 0.0088 |
| Lmbr1          | NM_020295    | 9 | 2745 | AAAGUGCUU | 2753 | 3 UTR | 0.0124 |
| P2rx4          | NM_011026    | 9 | 1817 | AAAGUGCUU | 1825 | 3 UTR | 0.0028 |
| Irak4          | NM_029926    | 9 | 1549 | AAAGUGCUU | 1557 | 3 UTR | 0.0038 |
| Vldlr          | NM_013703    | 9 | 3185 | AAAGUGCUU | 3193 | 3 UTR | 0.0018 |
| Znfx1          | NM_001033196 | 9 | 6448 | AAAGUGCUU | 6456 | 3 UTR | 0.0036 |
| AB041550       | NM_021418    | 9 | 1262 | AAAGUGCUU | 1270 | 3 UTR | 0.0041 |
| 2010321M09Rik  | NM_001077631 | 9 | 2843 | AAAGUGCUU | 2851 | 3 UTR | 0.0033 |
| Zfp26          | NM_011753    | 9 | 6079 | AAAGUGCUU | 6087 | 3 UTR | 0.0303 |
| Zfp830         | NM_025884    | 9 | 2278 | AAAGUGCUU | 2286 | 3 UTR | 0.0082 |
| March5         | NM_027314    | 9 | 1479 | AAAGUGCUU | 1487 | 3 UTR | 0.0024 |
| Cc2d1a         | NM_145970    | 9 | 3127 | AAAGUGCUU | 3135 | 3 UTR | 0.0018 |
| Ramp1          | NM_016894    | 9 | 1678 | AAAGUGCUU | 1686 | 3 UTR | 0.0070 |
| St6galnac6     | NM_001025311 | 9 | 2074 | AAAGUGCUU | 2082 | 3 UTR | 0.0049 |
| Pgbd5          | NM_171824    | 9 | 2652 | AAAGUGCUU | 2660 | 3 UTR | 0.0056 |
| Lrp11          | NM_172784    | 9 | 2708 | AAAGUGCUU | 2716 | 3 UTR | 0.0064 |
| Zfp708         | NM_001012325 | 9 | 2133 | AAAGUGCUU | 2141 | 3 UTR | 0.0030 |
| Liph           | NM_001083894 | 9 | 1775 | AAAGUGCUU | 1783 | 3 UTR | 0.0087 |
| Ogfod2         | NM_025671    | 9 | 1538 | AAAGUGCUU | 1546 | 3 UTR | 0.0019 |
| Slc35b4        | NM_021435    | 9 | 1597 | AAAGUGCUU | 1605 | 3 UTR | 0.0095 |
| Pgr15l         | NM_001033361 | 9 | 4028 | AAAGUGCUU | 4036 | 3 UTR | 0.0141 |
| Ddhd1          | NM_001042719 | 9 | 2996 | AAAGUGCUU | 3004 | 3 UTR | 0.0088 |
| Rgs8           | NM_026380    | 9 | 3529 | AAAGUGCUU | 3537 | 3 UTR | 0.0181 |
| Map3k2         | NM_011946    | 9 | 2650 | AAAGUGCUU | 2658 | 3 UTR | 0.0315 |
| Nek9           | NM_145138    | 9 | 3229 | AAAGUGCUU | 3237 | 3 UTR | 0.0088 |
| Fgd5           | NM_172731    | 9 | 4630 | AAAGUGCUU | 4638 | 3 UTR | 0.0054 |
| Ube2q2         | NM_180600    | 9 | 2435 | AAAGUGCUU | 2443 | 3 UTR | 0.0058 |
| Kif26b         | NM_177757    | 9 | 5100 | AAAGUGCUU | 5108 | 3 UTR | 0.0025 |
| Maoa           | NM_173740    | 9 | 2641 | AAAGUGCUU | 2649 | 3 UTR | 0.0089 |
| Lif            | NM_008501    | 9 | 2984 | AAAGUGCUU | 2992 | 3 UTR | 0.0121 |
| Ccnd1          | NM_007631    | 9 | 2043 | AAAGUGCUU | 2051 | 3 UTR | 0.0102 |
| Tmod2          | NM_001038710 | 9 | 2051 | AAAGUGCUU | 2059 | 3 UTR | 0.0318 |
| Srrp           | NM_177774    | 9 | 1248 | AAAGUGCUU | 1256 | 3 UTR | 0.0078 |
| St3gal1        | NM_009177    | 9 | 5555 | AAAGUGCUU | 5563 | 3 UTR | 0.0143 |
| CT025653.7-201 | NM_172765    | 9 | 1810 | AAAGUGCUU | 1818 | 3 UTR | 0.0269 |
| Bbs12          | NM_001008502 | 9 | 2329 | AAAGUGCUU | 2337 | 3 UTR | 0.0011 |
| Mknk2          | NM_021462    | 9 | 2953 | AAAGUGCUU | 2961 | 3 UTR | 0.0068 |
| Star           | NM_011485    | 9 | 2884 | AAAGUGCUU | 2892 | 3 UTR | 0.0117 |
| E130009J12Rik  | NM_001039104 | 9 | 5230 | AAAGUGCUU | 5238 | 3 UTR | 0.0025 |
| Irf9           | NM_008394    | 9 | 1701 | AAAGUGCUU | 1709 | 3 UTR | 0.0039 |
| Clock          | NM_007715    | 9 | 6795 | AAAGUGCUU | 6803 | 3 UTR | 0.0171 |
| Pbx3           | NM_016768    | 9 | 1607 | AAAGUGCUU | 1615 | 3 UTR | 0.0037 |
| Rnf6           | NM_028774    | 9 | 2614 | AAAGUGCUU | 2622 | 3 UTR | 0.0038 |
| Mmp23          | NM_011985    | 9 | 1418 | AAAGUGCUU | 1426 | 3 UTR | 0.0002 |

|                |              |   |       |           |       |       |        |
|----------------|--------------|---|-------|-----------|-------|-------|--------|
| Slc18a1        | NM_153054    | 9 | 2608  | AAAGUGCUU | 2616  | 3 UTR | 0.0041 |
| Tanc1          | NM_198294    | 9 | 7529  | AAAGUGCUU | 7537  | 3 UTR | 0.0077 |
| Lrrc3          | NM_145152    | 9 | 1157  | AAAGUGCUU | 1165  | 3 UTR | 0.0124 |
| Rapgef1        | NM_001080925 | 9 | 2409  | AAAGUGCUU | 2417  | 3 UTR | 0.0069 |
| Flt1           | NM_010228    | 9 | 5386  | AAAGUGCUU | 5394  | 3 UTR | 0.0077 |
| Ugp2           | NM_139297    | 9 | 1801  | AAAGUGCUU | 1809  | 3 UTR | 0.0033 |
| 4932442K08Rik  | NM_024203    | 9 | 3877  | AAAGUGCUU | 3885  | 3 UTR | 0.0070 |
| C1qa           | NM_007572    | 9 | 1041  | AAAGUGCUU | 1049  | 3 UTR | 0.0009 |
| Asb8           | NM_030121    | 9 | 1960  | AAAGUGCUU | 1968  | 3 UTR | 0.0044 |
| Zfp575         | NM_001033205 | 9 | 1686  | AAAGUGCUU | 1694  | 3 UTR | 0.0063 |
| Abca1          | NM_013454    | 9 | 10035 | AAAGUGCUU | 10043 | 3 UTR | 0.0120 |
| Arl4c          | NM_177305    | 9 | 3323  | AAAGUGCUU | 3331  | 3 UTR | 0.0109 |
| Ss18l1         | NM_178750    | 9 | 3709  | AAAGUGCUU | 3717  | 3 UTR | 0.0109 |
| Camk2n1        | NM_025451    | 9 | 370   | AAAGUGCUU | 378   | 3 UTR | 0.0127 |
| Olfm3          | NM_153458    | 9 | 1903  | AAAGUGCUU | 1911  | 3 UTR | 0.0091 |
| Vsx1           | NM_054068    | 9 | 2177  | AAAGUGCUU | 2185  | 3 UTR | 0.0088 |
| Midn           | NM_021565    | 9 | 2365  | AAAGUGCUU | 2373  | 3 UTR | 0.0066 |
| Klhl21         | NM_001033352 | 9 | 3482  | AAAGUGCUU | 3490  | 3 UTR | 0.0078 |
| Crot           | NM_023733    | 9 | 2350  | AAAGUGCUU | 2358  | 3 UTR | 0.0031 |
| Zfp810         | NM_145612    | 9 | 2015  | AAAGUGCUU | 2023  | 3 UTR | 0.0056 |
| Prdx6-rs1      | NM_177256    | 9 | 1887  | AAAGUGCUU | 1895  | 3 UTR | 0.0070 |
| Aifm1          | NM_012019    | 9 | 1948  | AAAGUGCUU | 1956  | 3 UTR | 0.0007 |
| Nr2c1          | NM_011629    | 9 | 2601  | AAAGUGCUU | 2609  | 3 UTR | 0.0071 |
| Zfp408         | NM_001033451 | 9 | 3286  | AAAGUGCUU | 3294  | 3 UTR | 0.0049 |
| Unkl           | NM_028789    | 9 | 1143  | AAAGUGCUU | 1151  | 3 UTR | 0.0098 |
| Snf1lk         | NM_010831    | 9 | 4106  | AAAGUGCUU | 4114  | 3 UTR | 0.0077 |
| 1810043G02Rik  | NM_026431    | 9 | 1043  | AAAGUGCUU | 1051  | 3 UTR | 0.0034 |
| Map6d1         | NM_198599    | 9 | 3251  | AAAGUGCUU | 3259  | 3 UTR | 0.0101 |
| 1700021K19Rik  | NM_172615    | 9 | 4946  | AAAGUGCUU | 4954  | 3 UTR | 0.0085 |
| AC160545.8     | NM_001033250 | 9 | 1915  | AAAGUGCUU | 1923  | 3 UTR | 0.0089 |
| Napepld        | NM_178728    | 9 | 2825  | AAAGUGCUU | 2833  | 3 UTR | 0.0088 |
| Mtm1           | NM_019926    | 9 | 2130  | AAAGUGCUU | 2138  | 3 UTR | 0.0055 |
| Atp2b2         | NM_001036684 | 9 | 5728  | AAAGUGCUU | 5736  | 3 UTR | 0.0110 |
| Kif5c          | NM_008449    | 9 | 5199  | AAAGUGCUU | 5207  | 3 UTR | 0.0138 |
| AC166360.4-201 | NM_199252    | 9 | 1997  | AAAGUGCUU | 2005  | 3 UTR | 0.0038 |
| Spic           | NM_011461    | 9 | 930   | AAAGUGCUU | 938   | 3 UTR | 0.0015 |
| Chrna2         | NM_144803    | 9 | 2604  | AAAGUGCUU | 2612  | 3 UTR | 0.0071 |
| Zfp597         | NM_001033159 | 9 | 1624  | AAAGUGCUU | 1632  | 3 UTR | 0.0155 |
| Slc6a9         | NM_008135    | 9 | 2445  | AAAGUGCUU | 2453  | 3 UTR | 0.0040 |
| Ttc9           | NM_001033149 | 9 | 1975  | AAAGUGCUU | 1983  | 3 UTR | 0.0051 |
| Rab30          | NM_029494    | 9 | 1259  | AAAGUGCUU | 1267  | 3 UTR | 0.0048 |
| Zbtb43         | NM_027947    | 9 | 3368  | AAAGUGCUU | 3376  | 3 UTR | 0.0129 |
| Pip4k2a        | NM_008845    | 9 | 3451  | AAAGUGCUU | 3459  | 3 UTR | 0.0081 |
| Rutbc2         | NM_172718    | 9 | 4177  | AAAGUGCUU | 4185  | 3 UTR | 0.0068 |
| Ptpn21         | NM_011877    | 9 | 4611  | AAAGUGCUU | 4619  | 3 UTR | 0.0069 |
| Dars           | NM_145507    | 9 | 545   | AAAGUGCUU | 553   | 3 UTR | 0.0009 |
| Pkd2l2         | NM_016927    | 9 | 2278  | AAAGUGCUU | 2286  | 3 UTR | 0.0022 |
| 1300010M03Rik  | NM_026501    | 8 | 2269  | AAAGUGCU  | 2276  | 3 UTR | 0.0248 |
| AA409316       | NM_134087    | 8 | 4248  | AAAGUGCU  | 4255  | 3 UTR | 0.0114 |
| Gnpnat1        | NM_019425    | 8 | 1814  | AAAGUGCU  | 1821  | 3 UTR | 0.0288 |
| Sh3glb1        | NM_019464    | 8 | 2632  | AAAGUGCU  | 2639  | 3 UTR | 0.0386 |
| Hdac9          | NM_024124    | 8 | 3599  | AAAGUGCU  | 3606  | 3 UTR | 0.0354 |
| Dpp3           | NM_133803    | 8 | 2386  | AAAGUGCU  | 2393  | 3 UTR | 0.0064 |
| Dusp2          | NM_010090    | 8 | 1547  | AAAGUGCU  | 1554  | 3 UTR | 0.0090 |
| Ankmy2         | NM_146033    | 8 | 2043  | AAAGUGCU  | 2050  | 3 UTR | 0.0135 |
| Mll3           | NM_001081383 | 8 | 15171 | AAAGUGCU  | 15178 | 3 UTR | 0.0282 |
| 1110018G07Rik  | NM_178065    | 8 | 4895  | AAAGUGCU  | 4902  | 3 UTR | 0.0355 |
| Tomm7          | NM_025394    | 8 | 995   | AAAGUGCU  | 1002  | 3 UTR | 0.0134 |
| Fndc3a         | NM_207636    | 8 | 5142  | AAAGUGCU  | 5149  | 3 UTR | 0.0338 |
| Tbc1d8b        | NM_001081499 | 8 | 4596  | AAAGUGCU  | 4603  | 3 UTR | 0.0356 |
| Mapk9          | NM_207692    | 8 | 1903  | AAAGUGCU  | 1910  | 3 UTR | 0.0420 |
| Rsrc2          | NM_001005525 | 8 | 2141  | AAAGUGCU  | 2148  | 3 UTR | 0.0113 |
| Frrmd4a        | NM_172475    | 8 | 3441  | AAAGUGCU  | 3448  | 3 UTR | 0.0432 |

|               |              |   |      |          |      |       |        |
|---------------|--------------|---|------|----------|------|-------|--------|
| Cbx4          | NM_007625    | 8 | 4684 | AAAGUGCU | 4691 | 3 UTR | 0.0496 |
| Ssx2ip        | NM_138744    | 8 | 2362 | AAAGUGCU | 2369 | 3 UTR | 0.0198 |
| Vsx2          | NM_007701    | 8 | 1629 | AAAGUGCU | 1636 | 3 UTR | 0.0304 |
| Tgfbrap1      | NM_001013025 | 8 | 4278 | AAAGUGCU | 4285 | 3 UTR | 0.0362 |
| Metap1        | NM_175224    | 8 | 1430 | AAAGUGCU | 1437 | 3 UTR | 0.0208 |
| Fgd4          | NM_139232    | 8 | 2705 | AAAGUGCU | 2712 | 3 UTR | 0.0092 |
| Rhov          | NM_145530    | 8 | 1036 | AAAGUGCU | 1043 | 3 UTR | 0.0134 |
| Dpysl5        | NM_023047    | 8 | 2370 | AAAGUGCU | 2377 | 3 UTR | 0.0462 |
| Sipa1l3       | NM_001081028 | 8 | 6333 | AAAGUGCU | 6340 | 3 UTR | 0.0266 |
| Txnip         | NM_001009935 | 8 | 2184 | AAAGUGCU | 2191 | 3 UTR | 0.0201 |
| Adam7         | NM_007402    | 8 | 3365 | AAAGUGCU | 3372 | 3 UTR | 0.0164 |
| Atxn7l1       | NM_001033436 | 8 | 2657 | AAAGUGCU | 2664 | 3 UTR | 0.0033 |
| Crk           | NM_133656    | 8 | 1691 | AAAGUGCU | 1698 | 3 UTR | 0.0388 |
| Map3k1        | NM_011945    | 8 | 4804 | AAAGUGCU | 4811 | 3 UTR | 0.0369 |
| Cybb          | NM_007807    | 8 | 1958 | AAAGUGCU | 1965 | 3 UTR | 0.0442 |
| Reep3         | NM_178606    | 8 | 1319 | AAAGUGCU | 1326 | 3 UTR | 0.0333 |
| Ear6          | NM_053111    | 8 | 546  | AAAGUGCU | 553  | 3 UTR | 0.0031 |
| Camta1        | NM_001081557 | 8 | 5962 | AAAGUGCU | 5969 | 3 UTR | 0.0491 |
| Slc2a4        | NM_009204    | 8 | 1798 | AAAGUGCU | 1805 | 3 UTR | 0.0164 |
| Ccnj          | NM_172839    | 8 | 2366 | AAAGUGCU | 2373 | 3 UTR | 0.0370 |
| Klhl23        | NM_177784    | 8 | 2439 | AAAGUGCU | 2446 | 3 UTR | 0.0398 |
| Rps6ka5       | NM_153587    | 8 | 3820 | AAAGUGCU | 3827 | 3 UTR | 0.0251 |
| Tmem97        | NM_133706    | 8 | 939  | AAAGUGCU | 946  | 3 UTR | 0.0109 |
| Ccdc55        | NM_001012309 | 8 | 1854 | AAAGUGCU | 1861 | 3 UTR | 0.0219 |
| Tmem123       | NM_133739    | 8 | 2421 | AAAGUGCU | 2428 | 3 UTR | 0.0322 |
| Dgke          | NM_019505    | 8 | 4805 | AAAGUGCU | 4812 | 3 UTR | 0.0469 |
| Zfp362        | NM_001081098 | 8 | 1664 | AAAGUGCU | 1671 | 3 UTR | 0.0217 |
| Rreb1         | NM_001039188 | 8 | 6743 | AAAGUGCU | 6750 | 3 UTR | 0.0448 |
| 2310014L17Rik | NM_029809    | 8 | 1418 | AAAGUGCU | 1425 | 3 UTR | 0.0327 |
| 0610007L01Rik | NM_001081394 | 8 | 2448 | AAAGUGCU | 2455 | 3 UTR | 0.0369 |
| Sfrs12        | NM_172592    | 8 | 3608 | AAAGUGCU | 3615 | 3 UTR | 0.0293 |
| Dmtf1         | NM_011806    | 8 | 3237 | AAAGUGCU | 3244 | 3 UTR | 0.0178 |
| Gpr88         | NM_022427    | 8 | 2358 | AAAGUGCU | 2365 | 3 UTR | 0.0279 |
| Arhgef18      | NM_133962    | 8 | 4868 | AAAGUGCU | 4875 | 3 UTR | 0.0310 |
| Brms1l        | NM_001037756 | 8 | 1663 | AAAGUGCU | 1670 | 3 UTR | 0.0220 |
| Acaa1a        | NM_130864    | 8 | 1604 | AAAGUGCU | 1611 | 3 UTR | 0.0040 |
| Mcfd2         | NM_139295    | 8 | 628  | AAAGUGCU | 635  | 3 UTR | 0.0192 |
| Epas1         | NM_010137    | 8 | 4817 | AAAGUGCU | 4824 | 3 UTR | 0.0346 |
| Fbxl4         | NM_172988    | 8 | 2339 | AAAGUGCU | 2346 | 3 UTR | 0.0048 |
| lhpk1         | NM_013785    | 8 | 3593 | AAAGUGCU | 3600 | 3 UTR | 0.0422 |
| Nrsn2         | NM_001009948 | 8 | 1135 | AAAGUGCU | 1142 | 3 UTR | 0.0121 |
| Bace2         | NM_019517    | 8 | 3569 | AAAGUGCU | 3576 | 3 UTR | 0.0318 |
| Osm           | NM_001013365 | 8 | 1365 | AAAGUGCU | 1372 | 3 UTR | 0.0154 |
| Atg7          | NM_028835    | 8 | 3022 | AAAGUGCU | 3029 | 3 UTR | 0.0138 |
| Pfn           | NM_019410    | 8 | 928  | AAAGUGCU | 935  | 3 UTR | 0.0206 |
| Tmem41b       | NM_153525    | 8 | 1550 | AAAGUGCU | 1557 | 3 UTR | 0.0388 |
| Tusc2         | NM_019742    | 8 | 836  | AAAGUGCU | 843  | 3 UTR | 0.0181 |
| Gabpb1        | NM_207669    | 8 | 2137 | AAAGUGCU | 2144 | 3 UTR | 0.0199 |
| Pcdhb17       | NM_053142    | 8 | 2761 | AAAGUGCU | 2768 | 3 UTR | 0.0113 |
| Erbp2ip       | NM_001005868 | 8 | 6321 | AAAGUGCU | 6328 | 3 UTR | 0.0289 |
| Hmbbox1       | NM_177338    | 8 | 2868 | AAAGUGCU | 2875 | 3 UTR | 0.0203 |
| Abcd2         | NM_011994    | 8 | 4317 | AAAGUGCU | 4324 | 3 UTR | 0.0464 |
| Jup           | NM_010593    | 8 | 2555 | AAAGUGCU | 2562 | 3 UTR | 0.0133 |
| Dir2          | NM_153550    | 8 | 2251 | AAAGUGCU | 2258 | 3 UTR | 0.0448 |
| Fto           | NM_011936    | 8 | 3403 | AAAGUGCU | 3410 | 3 UTR | 0.0304 |
| Ubxn2a        | NM_145441    | 8 | 1748 | AAAGUGCU | 1755 | 3 UTR | 0.0234 |
| Inoc1         | NM_026574    | 8 | 5142 | AAAGUGCU | 5149 | 3 UTR | 0.0200 |
| Nol8          | NM_001081350 | 8 | 3897 | AAAGUGCU | 3904 | 3 UTR | 0.0088 |
| Ebna1bp2      | NM_026932    | 8 | 2368 | AAAGUGCU | 2375 | 3 UTR | 0.0286 |
| Tspan11       | NM_026743    | 8 | 1463 | AAAGUGCU | 1470 | 3 UTR | 0.0473 |
| Chn2          | NM_023543    | 8 | 1934 | AAAGUGCU | 1941 | 3 UTR | 0.0241 |
| Synpo2l       | NM_175132    | 8 | 3316 | AAAGUGCU | 3323 | 3 UTR | 0.0134 |
| Wee1          | NM_009516    | 8 | 2725 | AAAGUGCU | 2732 | 3 UTR | 0.0179 |

|                |              |   |      |          |      |       |        |
|----------------|--------------|---|------|----------|------|-------|--------|
| Oxr1           | NM_130885    | 8 | 3808 | AAAGUGCU | 3815 | 3 UTR | 0.0264 |
| Gls            | NM_001081081 | 8 | 2895 | AAAGUGCU | 2902 | 3 UTR | 0.0405 |
| Tbc1d2         | NM_198664    | 8 | 3088 | AAAGUGCU | 3095 | 3 UTR | 0.0207 |
| Kif13a         | NM_010617    | 8 | 5503 | AAAGUGCU | 5510 | 3 UTR | 0.0229 |
| Sgcb           | NM_011890    | 8 | 2975 | AAAGUGCU | 2982 | 3 UTR | 0.0410 |
| Shc4           | NM_199022    | 8 | 3158 | AAAGUGCU | 3165 | 3 UTR | 0.0325 |
| Cadm2          | NM_178721    | 8 | 3803 | AAAGUGCU | 3810 | 3 UTR | 0.0304 |
| Atp1a2         | NM_178405    | 8 | 5255 | AAAGUGCU | 5262 | 3 UTR | 0.0446 |
| Ttc9c          | NM_027412    | 8 | 1659 | AAAGUGCU | 1666 | 3 UTR | 0.0399 |
| Acpl2          | NM_153420    | 8 | 2374 | AAAGUGCU | 2381 | 3 UTR | 0.0203 |
| Gns            | NM_029364    | 8 | 3699 | AAAGUGCU | 3706 | 3 UTR | 0.0318 |
| Fndc3b         | NM_173182    | 8 | 6130 | AAAGUGCU | 6137 | 3 UTR | 0.0466 |
| 5730593F17Rik  | NM_172543    | 8 | 1519 | AAAGUGCU | 1526 | 3 UTR | 0.0138 |
| Ormdl3         | NM_025661    | 8 | 959  | AAAGUGCU | 966  | 3 UTR | 0.0214 |
| Ogfrl1         | NM_001081079 | 8 | 4105 | AAAGUGCU | 4112 | 3 UTR | 0.0495 |
| E130311K13Rik  | NM_177856    | 8 | 952  | AAAGUGCU | 959  | 3 UTR | 0.0097 |
| Arid4b         | NM_198122    | 8 | 3991 | AAAGUGCU | 3998 | 3 UTR | 0.0281 |
| Mgat5b         | NM_172948    | 8 | 3047 | AAAGUGCU | 3054 | 3 UTR | 0.0194 |
| Znhit6         | NM_001081094 | 8 | 2214 | AAAGUGCU | 2221 | 3 UTR | 0.0192 |
| Zim1           | NM_011769    | 8 | 2733 | AAAGUGCU | 2740 | 3 UTR | 0.0227 |
| Acaa1b         | NM_146230    | 8 | 1482 | AAAGUGCU | 1489 | 3 UTR | 0.0045 |
| Icos           | NM_017480    | 8 | 1909 | AAAGUGCU | 1916 | 3 UTR | 0.0211 |
| A630047E20Rik  | NM_173032    | 8 | 2781 | AAAGUGCU | 2788 | 3 UTR | 0.0100 |
| Usp46          | NM_177561    | 8 | 2764 | AAAGUGCU | 2771 | 3 UTR | 0.0300 |
| Mycn           | NM_008709    | 8 | 2543 | AAAGUGCU | 2550 | 3 UTR | 0.0138 |
| Stk38l         | NM_172734    | 8 | 3285 | AAAGUGCU | 3292 | 3 UTR | 0.0464 |
| Josd1          | NM_028792    | 8 | 2777 | AAAGUGCU | 2784 | 3 UTR | 0.0275 |
| Gfpt2          | NM_013529    | 8 | 2797 | AAAGUGCU | 2804 | 3 UTR | 0.0130 |
| Ayt1l1         | NM_173014    | 8 | 2439 | AAAGUGCU | 2446 | 3 UTR | 0.0160 |
| Smc2           | NM_008017    | 8 | 3841 | AAAGUGCU | 3848 | 3 UTR | 0.0244 |
| F3             | NM_010171    | 8 | 1613 | AAAGUGCU | 1620 | 3 UTR | 0.0123 |
| Mupcdh         | NM_028069    | 8 | 2134 | AAAGUGCU | 2141 | 3 UTR | 0.0010 |
| Slc40a1        | NM_016917    | 8 | 3168 | AAAGUGCU | 3175 | 3 UTR | 0.0202 |
| Elavl2         | NM_207685    | 8 | 3440 | AAAGUGCU | 3447 | 3 UTR | 0.0378 |
| Slc5a7         | NM_022025    | 8 | 1981 | AAAGUGCU | 1988 | 3 UTR | 0.0440 |
| Fmo1           | NM_010231    | 8 | 2117 | AAAGUGCU | 2124 | 3 UTR | 0.0066 |
| Bcl2l14        | NM_025778    | 8 | 2120 | AAAGUGCU | 2127 | 3 UTR | 0.0149 |
| Arhgef4        | NM_183019    | 8 | 1815 | AAAGUGCU | 1822 | 3 UTR | 0.0144 |
| Map3k11        | NM_022012    | 8 | 3623 | AAAGUGCU | 3630 | 3 UTR | 0.0097 |
| Mtmr7          | NM_001040699 | 8 | 3194 | AAAGUGCU | 3201 | 3 UTR | 0.0210 |
| Cycs           | NM_007808    | 8 | 1527 | AAAGUGCU | 1534 | 3 UTR | 0.0400 |
| D030056L22Rik  | NM_177640    | 8 | 1325 | AAAGUGCU | 1332 | 3 UTR | 0.0160 |
| Rbp3           | NM_015745    | 8 | 4213 | AAAGUGCU | 4220 | 3 UTR | 0.0226 |
| Zfand2a        | NM_133349    | 8 | 1810 | AAAGUGCU | 1817 | 3 UTR | 0.0360 |
| Arhgef10       | NM_172751    | 8 | 5334 | AAAGUGCU | 5341 | 3 UTR | 0.0191 |
| Pdzd3          | NM_133226    | 8 | 2117 | AAAGUGCU | 2124 | 3 UTR | 0.0102 |
| Ssh3           | NM_198113    | 8 | 2478 | AAAGUGCU | 2485 | 3 UTR | 0.0104 |
| Itgb8          | NM_177290    | 8 | 2993 | AAAGUGCU | 3000 | 3 UTR | 0.0048 |
| Rbbp7          | NM_009031    | 8 | 1729 | AAAGUGCU | 1736 | 3 UTR | 0.0102 |
| Chst10         | NM_145142    | 8 | 1826 | AAAGUGCU | 1833 | 3 UTR | 0.0247 |
| AC160757.3-202 | NM_028494    | 8 | 2307 | AAAGUGCU | 2314 | 3 UTR | 0.0254 |
| Neu1           | NM_010893    | 8 | 1451 | AAAGUGCU | 1458 | 3 UTR | 0.0076 |
| Asah3l         | NM_139306    | 8 | 1834 | AAAGUGCU | 1841 | 3 UTR | 0.0493 |
| Hcrtr2         | NM_198962    | 8 | 2369 | AAAGUGCU | 2376 | 3 UTR | 0.0341 |
| Rell1          | NM_145923    | 8 | 2580 | AAAGUGCU | 2587 | 3 UTR | 0.0339 |
| Clec5a         | NM_001038604 | 8 | 3665 | AAAGUGCU | 3672 | 3 UTR | 0.0457 |
| Hmg20a         | NM_025812    | 8 | 1926 | AAAGUGCU | 1933 | 3 UTR | 0.0364 |
| Clic4          | NM_013885    | 8 | 936  | AAAGUGCU | 943  | 3 UTR | 0.0467 |
| Zfp697         | NM_172863    | 8 | 2968 | AAAGUGCU | 2975 | 3 UTR | 0.0495 |
| Amz2           | NM_025275    | 8 | 1683 | AAAGUGCU | 1690 | 3 UTR | 0.0216 |
| Foxn4          | NM_148935    | 8 | 2275 | AAAGUGCU | 2282 | 3 UTR | 0.0200 |
| Tmem87b        | NM_028248    | 8 | 2520 | AAAGUGCU | 2527 | 3 UTR | 0.0437 |
| Tiam1          | NM_009384    | 8 | 6529 | AAAGUGCU | 6536 | 3 UTR | 0.0302 |

|               |              |   |       |          |       |       |        |
|---------------|--------------|---|-------|----------|-------|-------|--------|
| Cntnap1       | NM_016782    | 8 | 4873  | AAAGUGCU | 4880  | 3 UTR | 0.0161 |
| Sult1a1       | NM_133670    | 8 | 1030  | AAAGUGCU | 1037  | 3 UTR | 0.0093 |
| Nufip1        | NM_013745    | 8 | 3183  | AAAGUGCU | 3190  | 3 UTR | 0.0371 |
| Wfs1          | NM_011716    | 8 | 3129  | AAAGUGCU | 3136  | 3 UTR | 0.0117 |
| Rbbp9         | NM_015754    | 8 | 775   | AAAGUGCU | 782   | 3 UTR | 0.0232 |
| Tal1          | NM_011527    | 8 | 3915  | AAAGUGCU | 3922  | 3 UTR | 0.0452 |
| Cygb          | NM_030206    | 8 | 996   | AAAGUGCU | 1003  | 3 UTR | 0.0206 |
| Cxadr         | NM_009988    | 8 | 1303  | AAAGUGCU | 1310  | 3 UTR | 0.0081 |
| Lhx8          | NM_010713    | 8 | 1643  | AAAGUGCU | 1650  | 3 UTR | 0.0103 |
| Aldh9a1       | NM_019993    | 8 | 2716  | AAAGUGCU | 2723  | 3 UTR | 0.0156 |
| Npas3         | NM_013780    | 8 | 2829  | AAAGUGCU | 2836  | 3 UTR | 0.0462 |
| Lrrc19        | NM_175305    | 8 | 1728  | AAAGUGCU | 1735  | 3 UTR | 0.0236 |
| Ppp6c         | NM_024209    | 8 | 1097  | AAAGUGCU | 1104  | 3 UTR | 0.0086 |
| E2f2          | NM_177733    | 8 | 3060  | AAAGUGCU | 3067  | 3 UTR | 0.0451 |
| 6030458C11Rik | NM_029998    | 8 | 1766  | AAAGUGCU | 1773  | 3 UTR | 0.0344 |
| MacroD2       | NM_028387    | 8 | 1601  | AAAGUGCU | 1608  | 3 UTR | 0.0420 |
| Naip5         | NM_010870    | 8 | 4948  | AAAGUGCU | 4955  | 3 UTR | 0.0143 |
| Nfatc2ip      | NM_010900    | 8 | 2629  | AAAGUGCU | 2636  | 3 UTR | 0.0319 |
| Daglb         | NM_144915    | 8 | 2785  | AAAGUGCU | 2792  | 3 UTR | 0.0160 |
| Slc5a10       | NM_001033227 | 8 | 2224  | AAAGUGCU | 2231  | 3 UTR | 0.0034 |
| Acox1         | NM_015729    | 8 | 2743  | AAAGUGCU | 2750  | 3 UTR | 0.0262 |
| Taf12         | NM_025579    | 8 | 1240  | AAAGUGCU | 1247  | 3 UTR | 0.0101 |
| Plscr4        | NM_178711    | 8 | 3003  | AAAGUGCU | 3010  | 3 UTR | 0.0257 |
| Pcdha10       | NM_054072    | 8 | 5100  | AAAGUGCU | 5107  | 3 UTR | 0.0360 |
| Armcx6        | NM_001007578 | 8 | 1352  | AAAGUGCU | 1359  | 3 UTR | 0.0113 |
| Psmf1         | NM_212446    | 8 | 2846  | AAAGUGCU | 2853  | 3 UTR | 0.0385 |
| Camta2        | NM_178116    | 8 | 4412  | AAAGUGCU | 4419  | 3 UTR | 0.0111 |
| E2f5          | NM_007892    | 8 | 1598  | AAAGUGCU | 1605  | 3 UTR | 0.0092 |
| Cep76         | NM_001081073 | 8 | 2857  | AAAGUGCU | 2864  | 3 UTR | 0.0276 |
| Dapk2         | NM_010019    | 8 | 1342  | AAAGUGCU | 1349  | 3 UTR | 0.0085 |
| Elk4          | NM_007923    | 8 | 3397  | AAAGUGCU | 3404  | 3 UTR | 0.0305 |
| Ptcd1         | NM_133735    | 8 | 2283  | AAAGUGCU | 2290  | 3 UTR | 0.0126 |
| Kpna2         | NM_010655    | 8 | 1894  | AAAGUGCU | 1901  | 3 UTR | 0.0044 |
| Wdr45         | NM_172372    | 8 | 1374  | AAAGUGCU | 1381  | 3 UTR | 0.0054 |
| Coq10b        | NM_001039710 | 8 | 1327  | AAAGUGCU | 1334  | 3 UTR | 0.0138 |
| Ank2          | NM_178655    | 8 | 5334  | AAAGUGCU | 5341  | 3 UTR | 0.0355 |
| C530043G21Rik | NM_145413    | 8 | 2935  | AAAGUGCU | 2942  | 3 UTR | 0.0424 |
| Rab11fip5     | NM_177466    | 8 | 4066  | AAAGUGCU | 4073  | 3 UTR | 0.0314 |
| 2310002B06Rik | NM_181649    | 8 | 1156  | AAAGUGCU | 1163  | 3 UTR | 0.0468 |
| 5730472N09Rik | NM_175392    | 8 | 2985  | AAAGUGCU | 2992  | 3 UTR | 0.0214 |
| Foxj2         | NM_021899    | 8 | 3756  | AAAGUGCU | 3763  | 3 UTR | 0.0381 |
| Exoc1         | NM_027270    | 8 | 3089  | AAAGUGCU | 3096  | 3 UTR | 0.0082 |
| Sdhd          | NM_025848    | 8 | 518   | AAAGUGCU | 525   | 3 UTR | 0.0112 |
| Trpv6         | NM_022413    | 8 | 2635  | AAAGUGCU | 2642  | 3 UTR | 0.0067 |
| Vhlh          | NM_009507    | 8 | 1227  | AAAGUGCU | 1234  | 3 UTR | 0.0310 |
| Fgf4          | NM_010202    | 8 | 780   | AAAGUGCU | 787   | 3 UTR | 0.0345 |
| Nrip3         | NM_020610    | 8 | 3831  | AAAGUGCU | 3838  | 3 UTR | 0.0465 |
| Uevld         | NM_001040695 | 8 | 2414  | AAAGUGCU | 2421  | 3 UTR | 0.0463 |
| Zfp213        | NM_001033496 | 8 | 2420  | AAAGUGCU | 2427  | 3 UTR | 0.0135 |
| Traf4         | NM_009423    | 8 | 3536  | AAAGUGCU | 3543  | 3 UTR | 0.0390 |
| Shisa3        | NM_001033415 | 8 | 1385  | AAAGUGCU | 1392  | 3 UTR | 0.0121 |
| Cd53          | NM_007651    | 8 | 2273  | AAAGUGCU | 2280  | 3 UTR | 0.0292 |
| Zfp488        | NM_001013777 | 8 | 2517  | AAAGUGCU | 2524  | 3 UTR | 0.0468 |
| Tfip11        | NM_018783    | 8 | 3323  | AAAGUGCU | 3330  | 3 UTR | 0.0111 |
| Wbscr27       | NM_024479    | 8 | 2659  | AAAGUGCU | 2666  | 3 UTR | 0.0297 |
| Phf7          | NM_027949    | 8 | 1810  | AAAGUGCU | 1817  | 3 UTR | 0.0073 |
| Rhobtb2       | NM_153514    | 8 | 3351  | AAAGUGCU | 3358  | 3 UTR | 0.0378 |
| Zbtb9         | NM_001005916 | 8 | 2404  | AAAGUGCU | 2411  | 3 UTR | 0.0185 |
| Gpr146        | NM_001038703 | 8 | 1232  | AAAGUGCU | 1239  | 3 UTR | 0.0443 |
| Osbp2         | NM_152818    | 8 | 3213  | AAAGUGCU | 3220  | 3 UTR | 0.0208 |
| Huwe1         | NM_021523    | 8 | 14554 | AAAGUGCU | 14561 | 3 UTR | 0.0158 |
| Gpr63         | NM_030733    | 8 | 2220  | AAAGUGCU | 2227  | 3 UTR | 0.0103 |
| Foxo1         | NM_019739    | 8 | 2556  | AAAGUGCU | 2563  | 3 UTR | 0.0383 |



|               |              |   |      |          |      |       |        |
|---------------|--------------|---|------|----------|------|-------|--------|
| Slain2        | NM_153567    | 8 | 2289 | AAAGUGCU | 2296 | 3 UTR | 0.0413 |
| Trp53inp2     | NM_178111    | 8 | 3333 | AAAGUGCU | 3340 | 3 UTR | 0.0455 |
| Parp3         | NM_145619    | 8 | 1822 | AAAGUGCU | 1829 | 3 UTR | 0.0133 |
| Ear1          | NM_007894    | 8 | 547  | AAAGUGCU | 554  | 3 UTR | 0.0031 |
| 4121402D02Rik | NM_028722    | 8 | 3156 | AAAGUGCU | 3163 | 3 UTR | 0.0366 |
| Ear12         | NM_007895    | 8 | 553  | AAAGUGCU | 560  | 3 UTR | 0.0027 |
| Ccdc137       | NM_152807    | 8 | 1364 | AAAGUGCU | 1371 | 3 UTR | 0.0281 |
| Entpd4        | NM_026174    | 8 | 2255 | AAAGUGCU | 2262 | 3 UTR | 0.0144 |
| Ear11         | NM_053113    | 8 | 524  | AAAGUGCU | 531  | 3 UTR | 0.0032 |
| C1qb          | NM_175484    | 8 | 3034 | AAAGUGCU | 3041 | 3 UTR | 0.0272 |
| Prps2         | NM_026662    | 8 | 2331 | AAAGUGCU | 2338 | 3 UTR | 0.0385 |
| Rufy1         | NM_172557    | 8 | 2334 | AAAGUGCU | 2341 | 3 UTR | 0.0078 |
| Il10rb        | NM_008349    | 8 | 1379 | AAAGUGCU | 1386 | 3 UTR | 0.0078 |
| Nedd1         | NM_008682    | 8 | 2882 | AAAGUGCU | 2889 | 3 UTR | 0.0220 |
| Slc25a27      | NM_028711    | 8 | 1102 | AAAGUGCU | 1109 | 3 UTR | 0.0257 |
| Scn1a         | NM_018733    | 8 | 7482 | AAAGUGCU | 7489 | 3 UTR | 0.0316 |
| Slc16a12      | NM_172838    | 8 | 3275 | AAAGUGCU | 3282 | 3 UTR | 0.0334 |
| Atp11c        | NM_001001798 | 8 | 4396 | AAAGUGCU | 4403 | 3 UTR | 0.0369 |
| Gdap1         | NM_010267    | 8 | 2018 | AAAGUGCU | 2025 | 3 UTR | 0.0416 |
| Ube2j1        | NM_019586    | 8 | 3435 | AAAGUGCU | 3442 | 3 UTR | 0.0360 |
| Pfkip         | NM_019703    | 8 | 2480 | AAAGUGCU | 2487 | 3 UTR | 0.0239 |
| Plekhm1       | NM_183034    | 8 | 4048 | AAAGUGCU | 4055 | 3 UTR | 0.0272 |
| Mr1           | NM_008209    | 8 | 2390 | AAAGUGCU | 2397 | 3 UTR | 0.0210 |
| Tceb3         | NM_013736    | 8 | 3235 | AAAGUGCU | 3242 | 3 UTR | 0.0337 |
| Alx4          | NM_007442    | 8 | 1528 | AAAGUGCU | 1535 | 3 UTR | 0.0057 |
| Lactb2        | NM_145381    | 8 | 1153 | AAAGUGCU | 1160 | 3 UTR | 0.0146 |
| Dgkq          | NM_199011    | 8 | 3668 | AAAGUGCU | 3675 | 3 UTR | 0.0261 |
| Zfp280d       | NM_146224    | 8 | 3344 | AAAGUGCU | 3351 | 3 UTR | 0.0193 |
| Tor1b         | NM_133673    | 8 | 1102 | AAAGUGCU | 1109 | 3 UTR | 0.0295 |
| Ak3l1         | NM_009647    | 8 | 2080 | AAAGUGCU | 2087 | 3 UTR | 0.0495 |
| Rbm11         | NM_198302    | 8 | 1588 | AAAGUGCU | 1595 | 3 UTR | 0.0289 |
| 1200013P24Rik | NM_029090    | 8 | 960  | AAAGUGCU | 967  | 3 UTR | 0.0229 |
| Pdia6         | NM_027959    | 8 | 2086 | AAAGUGCU | 2093 | 3 UTR | 0.0116 |
| Mapk14        | NM_011951    | 8 | 2880 | AAAGUGCU | 2887 | 3 UTR | 0.0310 |
| Camsap1l1     | NM_001081360 | 8 | 5905 | AAAGUGCU | 5912 | 3 UTR | 0.0406 |
| Spinlw1       | NM_029325    | 8 | 549  | AAAGUGCU | 556  | 3 UTR | 0.0045 |
| Sfrs17b       | NM_001081956 | 8 | 5488 | AAAGUGCU | 5495 | 3 UTR | 0.0417 |
| Trim6         | NM_001013616 | 8 | 2577 | AAAGUGCU | 2584 | 3 UTR | 0.0333 |
| Mul1          | NM_026689    | 8 | 2002 | AAAGUGCU | 2009 | 3 UTR | 0.0387 |
| Polq          | NM_029977    | 8 | 8012 | AAAGUGCU | 8019 | 3 UTR | 0.0119 |
| AC158970.3    | NM_020507    | 8 | 2121 | AAAGUGCU | 2128 | 3 UTR | 0.0368 |
| Rexo1         | NM_025852    | 8 | 5184 | AAAGUGCU | 5191 | 3 UTR | 0.0221 |
| Ppp3r1        | NM_024459    | 8 | 945  | AAAGUGCU | 952  | 3 UTR | 0.0312 |
| Pdc           | NM_024458    | 8 | 999  | AAAGUGCU | 1006 | 3 UTR | 0.0063 |
| Bhmt2         | NM_022884    | 8 | 1817 | AAAGUGCU | 1824 | 3 UTR | 0.0146 |
| Rtn4rl1       | NM_177708    | 8 | 2869 | AAAGUGCU | 2876 | 3 UTR | 0.0253 |
| Pnp1          | NM_013632    | 8 | 2655 | AAAGUGCU | 2662 | 3 UTR | 0.0269 |
| Clip4         | NM_030179    | 8 | 2452 | AAAGUGCU | 2459 | 3 UTR | 0.0271 |
| Aktip         | NM_010241    | 8 | 1501 | AAAGUGCU | 1508 | 3 UTR | 0.0162 |
| Clcn7         | NM_011930    | 8 | 2676 | AAAGUGCU | 2683 | 3 UTR | 0.0236 |
| Acsf2         | NM_153807    | 8 | 2363 | AAAGUGCU | 2370 | 3 UTR | 0.0182 |
| March8        | NM_027920    | 8 | 1871 | AAAGUGCU | 1878 | 3 UTR | 0.0479 |
| Dtl           | NM_029766    | 8 | 3184 | AAAGUGCU | 3191 | 3 UTR | 0.0282 |
| 4933407N01Rik | NM_025745    | 8 | 2940 | AAAGUGCU | 2947 | 3 UTR | 0.0300 |
| Cbara1        | NM_144822    | 8 | 2260 | AAAGUGCU | 2267 | 3 UTR | 0.0119 |
| Kat2b         | NM_020005    | 8 | 2583 | AAAGUGCU | 2590 | 3 UTR | 0.0279 |
| Ostm1         | NM_172416    | 8 | 2787 | AAAGUGCU | 2794 | 3 UTR | 0.0288 |
| Prrx1         | NM_011127    | 8 | 3402 | AAAGUGCU | 3409 | 3 UTR | 0.0470 |
| Chaf1a        | NM_013733    | 8 | 3071 | AAAGUGCU | 3078 | 3 UTR | 0.0072 |
| Tslp          | NM_021367    | 8 | 1064 | AAAGUGCU | 1071 | 3 UTR | 0.0104 |
| RP23-58H5.3   | NM_172877    | 8 | 2633 | AAAGUGCU | 2640 | 3 UTR | 0.0253 |
| Nanos1        | NM_178421    | 8 | 1183 | AAAGUGCU | 1190 | 3 UTR | 0.0427 |
| Col4a2        | NM_009932    | 8 | 5927 | AAAGUGCU | 5934 | 3 UTR | 0.0140 |

|                    |              |   |      |          |      |       |        |
|--------------------|--------------|---|------|----------|------|-------|--------|
| Bxdc1              | NM_001042556 | 8 | 1350 | AAAGUGCU | 1357 | 3 UTR | 0.0075 |
| Uchl1              | NM_011670    | 8 | 1015 | AAAGUGCU | 1022 | 3 UTR | 0.0048 |
| Fbxl2              | NM_178624    | 8 | 3066 | AAAGUGCU | 3073 | 3 UTR | 0.0282 |
| Mfsd9              | NM_172499    | 8 | 2748 | AAAGUGCU | 2755 | 3 UTR | 0.0258 |
| Pip4k2c            | NM_054097    | 8 | 2034 | AAAGUGCU | 2041 | 3 UTR | 0.0302 |
| Klhl12             | NM_153128    | 8 | 2051 | AAAGUGCU | 2058 | 3 UTR | 0.0214 |
| Lbxcor1            | NM_172446    | 8 | 3548 | AAAGUGCU | 3555 | 3 UTR | 0.0106 |
| Osbpl5             | NM_024289    | 8 | 2990 | AAAGUGCU | 2997 | 3 UTR | 0.0160 |
| C230093N12Rik      | NM_153560    | 8 | 2947 | AAAGUGCU | 2954 | 3 UTR | 0.0346 |
| Rnf138             | NM_207623    | 8 | 2558 | AAAGUGCU | 2565 | 3 UTR | 0.0311 |
| Mmaa               | NM_133823    | 8 | 2462 | AAAGUGCU | 2469 | 3 UTR | 0.0227 |
| Casp12             | NM_009808    | 8 | 2469 | AAAGUGCU | 2476 | 3 UTR | 0.0197 |
| Lig4               | NM_176953    | 8 | 1493 | AAAGUGCU | 1500 | 3 UTR | 0.0000 |
| Sec14l4            | NM_146013    | 8 | 1436 | AAAGUGCU | 1443 | 3 UTR | 0.0253 |
| Clec1a             | NM_175526    | 8 | 2522 | AAAGUGCU | 2529 | 3 UTR | 0.0325 |
| Cdkn1a             | NM_007669    | 8 | 1016 | AAAGUGCU | 1023 | 3 UTR | 0.0201 |
| Tgds               | NM_029578    | 8 | 1474 | AAAGUGCU | 1481 | 3 UTR | 0.0097 |
| Prr16              | NM_001081224 | 8 | 1021 | AAAGUGCU | 1028 | 3 UTR | 0.0193 |
| 4930562D19Rik      | NM_177616    | 8 | 4160 | AAAGUGCU | 4167 | 3 UTR | 0.0384 |
| Diablo             | NM_023232    | 8 | 1501 | AAAGUGCU | 1508 | 3 UTR | 0.0179 |
| Mllt11             | NM_019914    | 8 | 1972 | AAAGUGCU | 1979 | 3 UTR | 0.0247 |
| Centg1             | NM_001033263 | 8 | 4395 | AAAGUGCU | 4402 | 3 UTR | 0.0205 |
| BC038286           | NM_170755    | 8 | 2367 | AAAGUGCU | 2374 | 3 UTR | 0.0130 |
| Nat14              | NM_201355    | 7 | 1126 | AAAGUGC  | 1132 | 3 UTR | 0.0333 |
| Fgd1               | NM_008001    | 7 | 3434 | AAAGUGC  | 3440 | 3 UTR | 0.0116 |
| Tctex1d2           | NM_025329    | 7 | 620  | AAAGUGC  | 626  | 3 UTR | 0.0072 |
| Psd                | NM_028627    | 7 | 3508 | AAAGUGC  | 3514 | 3 UTR | 0.0396 |
| Galnt1             | NM_013814    | 7 | 2245 | AAAGUGC  | 2251 | 3 UTR | 0.0471 |
| 6330527O06Rik      | NM_029530    | 7 | 1292 | AAAGUGC  | 1298 | 3 UTR | 0.0439 |
| AC090489.8         | NM_001081040 | 7 | 2444 | AAAGUGC  | 2450 | 3 UTR | 0.0317 |
| Afg3l2             | NM_027130    | 7 | 3039 | AAAGUGC  | 3045 | 3 UTR | 0.0325 |
| Trip10             | NM_134125    | 7 | 1817 | AAAGUGC  | 1823 | 3 UTR | 0.0166 |
| Arl6ip5            | NM_022992    | 7 | 641  | AAAGUGC  | 647  | 3 UTR | 0.0443 |
| Adcy2              | NM_153534    | 7 | 3584 | AAAGUGC  | 3590 | 3 UTR | 0.0405 |
| Orm2               | NM_011016    | 7 | 722  | AAAGUGC  | 728  | 3 UTR | 0.0068 |
| Nup35              | NM_027091    | 7 | 1210 | AAAGUGC  | 1216 | 3 UTR | 0.0303 |
| Dnajc2             | NM_009584    | 7 | 2003 | AAAGUGC  | 2009 | 3 UTR | 0.0035 |
| Mcm3               | NM_008563    | 7 | 2728 | AAAGUGC  | 2734 | 3 UTR | 0.0266 |
| OTTMUSG00000005491 | NM_001013783 | 7 | 2155 | AAAGUGC  | 2161 | 3 UTR | 0.0069 |
| 2210018M11Rik      | NM_172280    | 7 | 3948 | AAAGUGC  | 3954 | 3 UTR | 0.0061 |
| Mat2b              | NM_134017    | 7 | 1122 | AAAGUGC  | 1128 | 3 UTR | 0.0432 |
| 9530002B09Rik      | NM_023865    | 7 | 812  | AAAGUGC  | 818  | 3 UTR | 0.0187 |
| 0610010E21Rik      | NM_001033140 | 7 | 625  | AAAGUGC  | 631  | 3 UTR | 0.0350 |
| Mrpl3              | NM_053159    | 7 | 1232 | AAAGUGC  | 1238 | 3 UTR | 0.0200 |
| Serpinb9b          | NM_011452    | 7 | 1435 | AAAGUGC  | 1441 | 3 UTR | 0.0359 |
| Rasd1              | NM_009026    | 7 | 1497 | AAAGUGC  | 1503 | 3 UTR | 0.0377 |
| Kcnq2              | NM_001003824 | 7 | 2598 | AAAGUGC  | 2604 | 3 UTR | 0.0356 |
| Ninj2              | NM_016718    | 7 | 656  | AAAGUGC  | 662  | 3 UTR | 0.0208 |
| Fbxo39             | NM_001099688 | 7 | 1534 | AAAGUGC  | 1540 | 3 UTR | 0.0126 |
| Dsg4               | NM_181564    | 7 | 3417 | AAAGUGC  | 3423 | 3 UTR | 0.0132 |
| Trim3              | NM_018880    | 7 | 2525 | AAAGUGC  | 2531 | 3 UTR | 0.0353 |
| Gabrg2             | NM_008073    | 7 | 1831 | AAAGUGC  | 1837 | 3 UTR | 0.0276 |
| Neurog1            | NM_010896    | 7 | 1222 | AAAGUGC  | 1228 | 3 UTR | 0.0442 |
| Laptm4a            | NM_008640    | 7 | 1872 | AAAGUGC  | 1878 | 3 UTR | 0.0331 |
| Hacl1              | NM_019975    | 7 | 2218 | AAAGUGC  | 2224 | 3 UTR | 0.0468 |
| Cyp46a1            | NM_010010    | 7 | 2041 | AAAGUGC  | 2047 | 3 UTR | 0.0347 |
| Ttc30b             | NM_028235    | 7 | 2190 | AAAGUGC  | 2196 | 3 UTR | 0.0350 |
| Pthlh              | NM_008970    | 7 | 1333 | AAAGUGC  | 1339 | 3 UTR | 0.0276 |
| Nt5dc2             | NM_027289    | 7 | 1331 | AAAGUGC  | 1337 | 3 UTR | 0.0065 |
| Sorl1              | NM_011436    | 7 | 6902 | AAAGUGC  | 6908 | 3 UTR | 0.0069 |
| Men1               | NM_008583    | 7 | 2641 | AAAGUGC  | 2647 | 3 UTR | 0.0434 |
| Serpinb9c          | NM_011453    | 7 | 1292 | AAAGUGC  | 1298 | 3 UTR | 0.0419 |
| Pdcd1lg2           | NM_021396    | 7 | 1090 | AAAGUGC  | 1096 | 3 UTR | 0.0419 |

|                |              |   |      |         |      |       |        |
|----------------|--------------|---|------|---------|------|-------|--------|
| Tmem63a        | NM_144794    | 7 | 2743 | AAAGUGC | 2749 | 3 UTR | 0.0458 |
| Pla2g6         | NM_016915    | 7 | 2499 | AAAGUGC | 2505 | 3 UTR | 0.0314 |
| Pus1           | NM_001025561 | 7 | 1809 | AAAGUGC | 1815 | 3 UTR | 0.0177 |
| BC064033       | NM_173375    | 7 | 822  | AAAGUGC | 828  | 3 UTR | 0.0464 |
| Zfp553         | NM_146201    | 7 | 2437 | AAAGUGC | 2443 | 3 UTR | 0.0493 |
| Clpx           | NM_011802    | 7 | 2835 | AAAGUGC | 2841 | 3 UTR | 0.0450 |
| Orm3           | NM_013623    | 7 | 720  | AAAGUGC | 726  | 3 UTR | 0.0069 |
| Dusp8          | NM_008748    | 7 | 2418 | AAAGUGC | 2424 | 3 UTR | 0.0220 |
| Nkx2-5         | NM_008700    | 7 | 1374 | AAAGUGC | 1380 | 3 UTR | 0.0216 |
| Nagk           | NM_019542    | 7 | 1324 | AAAGUGC | 1330 | 3 UTR | 0.0072 |
| Bcap31         | NM_012060    | 7 | 1070 | AAAGUGC | 1076 | 3 UTR | 0.0226 |
| Thra           | NM_178060    | 7 | 2197 | AAAGUGC | 2203 | 3 UTR | 0.0350 |
| Gbf1           | NM_178930    | 7 | 6188 | AAAGUGC | 6194 | 3 UTR | 0.0354 |
| 5430432M24Rik  | NM_146127    | 7 | 1243 | AAAGUGC | 1249 | 3 UTR | 0.0345 |
| Usp3           | NM_144937    | 7 | 1755 | AAAGUGC | 1761 | 3 UTR | 0.0319 |
| 3200002M19Rik  | NM_027532    | 7 | 619  | AAAGUGC | 625  | 3 UTR | 0.0183 |
| Nrbp1          | NM_147201    | 7 | 1886 | AAAGUGC | 1892 | 3 UTR | 0.0261 |
| Xpc            | NM_009531    | 7 | 3400 | AAAGUGC | 3406 | 3 UTR | 0.0449 |
| Wbp7           | NM_029274    | 7 | 8384 | AAAGUGC | 8390 | 3 UTR | 0.0185 |
| Pde5a          | NM_153422    | 7 | 2748 | AAAGUGC | 2754 | 3 UTR | 0.0488 |
| Ppapdc1b       | NM_028000    | 7 | 963  | AAAGUGC | 969  | 3 UTR | 0.0395 |
| Bmpr2          | NM_007561    | 7 | 3334 | AAAGUGC | 3340 | 3 UTR | 0.0226 |
| Egr3           | NM_018781    | 7 | 1365 | AAAGUGC | 1371 | 3 UTR | 0.0153 |
| Prl7d1         | NM_011120    | 7 | 846  | AAAGUGC | 852  | 3 UTR | 0.0103 |
| 2610020H08Rik  | NM_001004187 | 7 | 1662 | AAAGUGC | 1668 | 3 UTR | 0.0115 |
| Lilrb3         | NM_011095    | 7 | 2650 | AAAGUGC | 2656 | 3 UTR | 0.0089 |
| AC124479.4-201 | NM_001081471 | 7 | 1212 | AAAGUGC | 1218 | 3 UTR | 0.0424 |
| Mrps24         | NM_026080    | 7 | 547  | AAAGUGC | 553  | 3 UTR | 0.0280 |
| Cldn5          | NM_013805    | 7 | 998  | AAAGUGC | 1004 | 3 UTR | 0.0364 |
| Phf1           | NM_009343    | 7 | 2141 | AAAGUGC | 2147 | 3 UTR | 0.0196 |
| AC154553.3     | NM_018751    | 7 | 1458 | AAAGUGC | 1464 | 3 UTR | 0.0306 |
| Fastk          | NM_023229    | 7 | 1783 | AAAGUGC | 1789 | 3 UTR | 0.0069 |
| C430048L16Rik  | NM_198957    | 7 | 3233 | AAAGUGC | 3239 | 3 UTR | 0.0392 |
| Ifit3          | NM_010501    | 7 | 1381 | AAAGUGC | 1387 | 3 UTR | 0.0427 |
| Trem2          | NM_031254    | 7 | 1064 | AAAGUGC | 1070 | 3 UTR | 0.0169 |
| Btbd7          | NM_172806    | 7 | 4072 | AAAGUGC | 4078 | 3 UTR | 0.0290 |
| Tcea2          | NM_009326    | 7 | 1117 | AAAGUGC | 1123 | 3 UTR | 0.0101 |
| Lipt1          | NM_001037918 | 7 | 1428 | AAAGUGC | 1434 | 3 UTR | 0.0189 |
| Rft1           | NM_177815    | 7 | 1681 | AAAGUGC | 1687 | 3 UTR | 0.0430 |
| Fanci          | NM_145946    | 7 | 4586 | AAAGUGC | 4592 | 3 UTR | 0.0333 |
| Apol10b        | NM_177820    | 7 | 1737 | AAAGUGC | 1743 | 3 UTR | 0.0485 |
| Xrcc4          | NM_028012    | 7 | 1339 | AAAGUGC | 1345 | 3 UTR | 0.0263 |
| 2410004L22Rik  | NM_029621    | 7 | 1341 | AAAGUGC | 1347 | 3 UTR | 0.0163 |
| C8b            | NM_133882    | 7 | 2067 | AAAGUGC | 2073 | 3 UTR | 0.0234 |
| Plekhg5        | NM_001004156 | 7 | 3806 | AAAGUGC | 3812 | 3 UTR | 0.0493 |
| 5730410E15Rik  | NM_176998    | 7 | 2830 | AAAGUGC | 2836 | 3 UTR | 0.0428 |
| Mcm7           | NM_008568    | 7 | 2348 | AAAGUGC | 2354 | 3 UTR | 0.0079 |
| Ctxn1          | NM_183315    | 7 | 1011 | AAAGUGC | 1017 | 3 UTR | 0.0448 |
| Btg3           | NM_009770    | 7 | 1111 | AAAGUGC | 1117 | 3 UTR | 0.0264 |
| Abcg2          | NM_011920    | 7 | 2475 | AAAGUGC | 2481 | 3 UTR | 0.0038 |
| Sqstm1         | NM_011018    | 7 | 1989 | AAAGUGC | 1995 | 3 UTR | 0.0382 |
| Myh14          | NM_028021    | 7 | 6043 | AAAGUGC | 6049 | 3 UTR | 0.0236 |
| Tsg101         | NM_021884    | 7 | 1415 | AAAGUGC | 1421 | 3 UTR | 0.0353 |
| Unc45a         | NM_133952    | 7 | 3028 | AAAGUGC | 3034 | 3 UTR | 0.0205 |
| Prickle3       | NM_175097    | 7 | 2369 | AAAGUGC | 2375 | 3 UTR | 0.0274 |
| Prom2          | NM_138750    | 7 | 2811 | AAAGUGC | 2817 | 3 UTR | 0.0105 |
| Pdzd7          | NM_177605    | 7 | 1626 | AAAGUGC | 1632 | 3 UTR | 0.0424 |
| Tnks1bp1       | NM_001081260 | 7 | 5435 | AAAGUGC | 5441 | 3 UTR | 0.0299 |
| Hsd17b11       | NM_053262    | 7 | 1352 | AAAGUGC | 1358 | 3 UTR | 0.0445 |
| Sds            | NM_145565    | 7 | 1144 | AAAGUGC | 1150 | 3 UTR | 0.0077 |
| Cpne7          | NM_170684    | 7 | 2285 | AAAGUGC | 2291 | 3 UTR | 0.0374 |
| Zfp54          | NM_011760    | 7 | 2360 | AAAGUGC | 2366 | 3 UTR | 0.0230 |
| Topors         | NM_134097    | 7 | 3448 | AAAGUGC | 3454 | 3 UTR | 0.0345 |

|               |              |   |      |         |      |       |        |
|---------------|--------------|---|------|---------|------|-------|--------|
| Neurog3       | NM_009719    | 7 | 1392 | AAAGUGC | 1398 | 3 UTR | 0.0392 |
| Spp1          | NM_009263    | 7 | 1175 | AAAGUGC | 1181 | 3 UTR | 0.0260 |
| Smad6         | NM_008542    | 7 | 2018 | AAAGUGC | 2024 | 3 UTR | 0.0255 |
| Cpe           | NM_013494    | 7 | 1904 | AAAGUGC | 1910 | 3 UTR | 0.0348 |
| Gstm6         | NM_008184    | 7 | 1043 | AAAGUGC | 1049 | 3 UTR | 0.0229 |
| Crc1          | NM_028798    | 7 | 524  | AAAGUGC | 530  | 3 UTR | 0.0189 |
| Wasf1         | NM_031877    | 7 | 2107 | AAAGUGC | 2113 | 3 UTR | 0.0493 |
| Prr15         | NM_030024    | 7 | 1230 | AAAGUGC | 1236 | 3 UTR | 0.0344 |
| Cd6           | NM_009852    | 7 | 2456 | AAAGUGC | 2462 | 3 UTR | 0.0496 |
| 1700113017Rik | NM_026627    | 7 | 442  | AAAGUGC | 448  | 3 UTR | 0.0071 |
| Xrn1          | NM_011916    | 7 | 5408 | AAAGUGC | 5414 | 3 UTR | 0.0142 |
| Dyrk4         | NM_207210    | 7 | 2055 | AAAGUGC | 2061 | 3 UTR | 0.0100 |
| Caml          | NM_007596    | 7 | 1308 | AAAGUGC | 1314 | 3 UTR | 0.0251 |
| Nr2e3         | NM_013708    | 7 | 1947 | AAAGUGC | 1953 | 3 UTR | 0.0369 |
| AC140392.3    | NM_001039147 | 7 | 1576 | AAAGUGC | 1582 | 3 UTR | 0.0390 |
| AI314976      | NM_207219    | 7 | 1016 | AAAGUGC | 1022 | 3 UTR | 0.0289 |
| Ccdc64b       | NM_153784    | 7 | 1689 | AAAGUGC | 1695 | 3 UTR | 0.0223 |
| Ugdh          | NM_009466    | 7 | 2017 | AAAGUGC | 2023 | 3 UTR | 0.0449 |
| Ccdc128       | NM_028658    | 7 | 2599 | AAAGUGC | 2605 | 3 UTR | 0.0390 |
| Rnf151        | NM_026205    | 7 | 1107 | AAAGUGC | 1113 | 3 UTR | 0.0239 |

**Comprehensive view of miRNA predicted targets on mRNA 3' UTR region produced by miRWalk and other program**

Note : The below table displays all putative targets produced by both miRWalk and other programs i.e. contains all the putative targets of other programs (3rd party algorithms).

| MicroRNA    | Gene | miRanda | miRDB | miRWalk | RNA22 | Targetscan | SUM |
|-------------|------|---------|-------|---------|-------|------------|-----|
| mmu-miR-294 | Nos2 | 1       | 0     | 1       | 0     | 1          | 3   |

**S4 Table: In silico analysis of predicted miR-721 mRNA targets.** Prediction analysis of miR-721 binding sequences in the 3' UTR of mRNA targets using the miRWalk software.

| Gene Name          | RefSeqID     | Seed Length | Start | Sequence       | End  | Pvalue |
|--------------------|--------------|-------------|-------|----------------|------|--------|
| Nfya               | NM_010913    | 14          | 3402  | CAGUGCAAUUAAAA | 3415 | 0.0000 |
| Slc35d1            | NM_177732    | 14          | 1565  | CAGUGCAAUUAAAA | 1578 | 0.0000 |
| Ube2d1             | NM_145420    | 12          | 1245  | CAGUGCAAUUAAA  | 1256 | 0.0001 |
| Ott                | NM_011022    | 11          | 1515  | CAGUGCAAUUA    | 1525 | 0.0001 |
| Zfand1             | NM_025512    | 11          | 1451  | CAGUGCAAUUA    | 1461 | 0.0002 |
| Ttc39b             | NM_027238    | 11          | 6669  | CAGUGCAAUUA    | 6679 | 0.0016 |
| OTTMUSG00000019138 | NM_001037716 | 11          | 1436  | CAGUGCAAUUA    | 1446 | 0.0001 |
| Ebi2               | NM_183031    | 11          | 1501  | CAGUGCAAUUA    | 1511 | 0.0004 |
| Sub1               | NM_011294    | 10          | 1676  | CAGUGCAAUU     | 1685 | 0.0027 |
| Slc24a2            | NM_172426    | 10          | 6161  | CAGUGCAAUU     | 6170 | 0.0078 |
| Erlin2             | NM_153592    | 10          | 2135  | CAGUGCAAUU     | 2144 | 0.0027 |
| Uts2d              | NM_198166    | 10          | 645   | CAGUGCAAUU     | 654  | 0.0004 |
| Cyld               | NM_173369    | 10          | 5159  | CAGUGCAAUU     | 5168 | 0.0047 |
| Gjd2               | NM_010290    | 10          | 2127  | CAGUGCAAUU     | 2136 | 0.0014 |
| Manba              | NM_027288    | 10          | 3604  | CAGUGCAAUU     | 3613 | 0.0009 |
| Tmem178            | NM_026516    | 10          | 1200  | CAGUGCAAUU     | 1209 | 0.0007 |
| Rasef              | NM_001017427 | 10          | 2213  | CAGUGCAAUU     | 2222 | 0.0029 |
| Ppp1r9a            | NM_181595    | 10          | 8589  | CAGUGCAAUU     | 8598 | 0.0056 |
| AC121108.12        | NM_030732    | 10          | 4395  | CAGUGCAAUU     | 4404 | 0.0059 |
| Tspyl2             | NM_029836    | 10          | 2554  | CAGUGCAAUU     | 2563 | 0.0006 |
| Acyp2              | NM_029344    | 10          | 354   | CAGUGCAAUU     | 363  | 0.0003 |
| Gadd45a            | NM_007836    | 10          | 690   | CAGUGCAAUU     | 699  | 0.0005 |
| Frmf8              | NM_026169    | 10          | 2240  | CAGUGCAAUU     | 2249 | 0.0016 |
| Clock              | NM_007715    | 10          | 3811  | CAGUGCAAUU     | 3820 | 0.0043 |
| Zfp110             | NM_022981    | 10          | 3125  | CAGUGCAAUU     | 3134 | 0.0006 |
| Cerk               | NM_145475    | 10          | 3841  | CAGUGCAAUU     | 3850 | 0.0023 |
| Rdh16              | NM_009040    | 10          | 3124  | CAGUGCAAUU     | 3133 | 0.0021 |
| Phf3               | NM_001081080 | 10          | 6475  | CAGUGCAAUU     | 6484 | 0.0014 |
| Tnfrsf1b           | NM_011610    | 10          | 2823  | CAGUGCAAUU     | 2832 | 0.0033 |
| Rxfp3              | NM_178717    | 10          | 3533  | CAGUGCAAUU     | 3542 | 0.0020 |
| C030011014Rik      | NM_174868    | 10          | 3803  | CAGUGCAAUU     | 3812 | 0.0027 |
| EG240055           | NM_001081656 | 10          | 4637  | CAGUGCAAUU     | 4646 | 0.0043 |
| Slc39a3            | NM_134135    | 9           | 2846  | CAGUGCAAU      | 2854 | 0.0092 |
| Fut9               | NM_010243    | 9           | 2843  | CAGUGCAAU      | 2851 | 0.0389 |
| Aff1               | NM_133919    | 9           | 5883  | CAGUGCAAU      | 5891 | 0.0170 |
| Phactr2            | NM_001033257 | 9           | 1815  | CAGUGCAAU      | 1823 | 0.0033 |
| Hepacam2           | NM_178899    | 9           | 2125  | CAGUGCAAU      | 2133 | 0.0031 |
| Cdc216             | NM_198164    | 9           | 2793  | CAGUGCAAU      | 2801 | 0.0089 |
| Tmprss3            | NM_080727    | 9           | 1530  | CAGUGCAAU      | 1538 | 0.0051 |
| Atp9b              | NM_015805    | 9           | 3615  | CAGUGCAAU      | 3623 | 0.0036 |
| Kcna4              | NM_021275    | 9           | 3250  | CAGUGCAAU      | 3258 | 0.0061 |
| Plekha2            | NM_031257    | 9           | 2488  | CAGUGCAAU      | 2496 | 0.0070 |
| 9930013L23Rik      | NM_030728    | 9           | 4808  | CAGUGCAAU      | 4816 | 0.0032 |
| Pfkfb4             | NM_173019    | 9           | 3296  | CAGUGCAAU      | 3304 | 0.0070 |
| Usp48              | NM_130879    | 9           | 3526  | CAGUGCAAU      | 3534 | 0.0092 |
| Ano5               | NM_177694    | 9           | 5716  | CAGUGCAAU      | 5724 | 0.0184 |
| Mcam               | NM_023061    | 9           | 1989  | CAGUGCAAU      | 1997 | 0.0035 |
| Ralbp1             | NM_009067    | 9           | 3163  | CAGUGCAAU      | 3171 | 0.0059 |
| Erc1               | NM_053204    | 9           | 6244  | CAGUGCAAU      | 6252 | 0.0183 |
| Inoc1              | NM_026574    | 9           | 5802  | CAGUGCAAU      | 5810 | 0.0050 |
| Tbc1d1             | NM_019636    | 9           | 1292  | CAGUGCAAU      | 1300 | 0.0205 |
| Bbx                | NM_027444    | 9           | 7000  | CAGUGCAAU      | 7008 | 0.0216 |
| Itga4              | NM_010576    | 9           | 5329  | CAGUGCAAU      | 5337 | 0.0245 |
| Fbxw5              | NM_013908    | 9           | 1915  | CAGUGCAAU      | 1923 | 0.0019 |
| Btbd9              | NM_172618    | 9           | 2279  | CAGUGCAAU      | 2287 | 0.0176 |
| Csf1               | NM_007778    | 9           | 2851  | CAGUGCAAU      | 2859 | 0.0081 |

|               |              |   |       |           |       |        |
|---------------|--------------|---|-------|-----------|-------|--------|
| Tnpo1         | NM_178716    | 9 | 4789  | CAGUGCAAU | 4797  | 0.0098 |
| Stk38l        | NM_172734    | 9 | 1772  | CAGUGCAAU | 1780  | 0.0118 |
| Cyp4a14       | NM_007822    | 9 | 1828  | CAGUGCAAU | 1836  | 0.0036 |
| Rybp          | NM_019743    | 9 | 2931  | CAGUGCAAU | 2939  | 0.0137 |
| Kdelc2        | NM_212445    | 9 | 2598  | CAGUGCAAU | 2606  | 0.0078 |
| Eefsec        | NM_023060    | 9 | 1914  | CAGUGCAAU | 1922  | 0.0033 |
| Pramef12      | NM_029948    | 9 | 2297  | CAGUGCAAU | 2305  | 0.0035 |
| Jub           | NM_010590    | 9 | 2886  | CAGUGCAAU | 2894  | 0.0056 |
| Zfp780b       | NM_001081021 | 9 | 3770  | CAGUGCAAU | 3778  | 0.0110 |
| Kcne2         | NM_134110    | 9 | 1492  | CAGUGCAAU | 1500  | 0.0045 |
| Mtmr12        | NM_172958    | 9 | 3562  | CAGUGCAAU | 3570  | 0.0082 |
| Hs3st1        | NM_010474    | 9 | 1519  | CAGUGCAAU | 1527  | 0.0016 |
| Dpy19l1       | NM_172920    | 9 | 319   | CAGUGCAAU | 327   | 0.0180 |
| Mll1          | NM_001081049 | 9 | 14253 | CAGUGCAAU | 14261 | 0.0172 |
| Sgms1         | NM_144792    | 9 | 2062  | CAGUGCAAU | 2070  | 0.0063 |
| Mtmr1         | NM_016985    | 9 | 3263  | CAGUGCAAU | 3271  | 0.0094 |
| Ensa          | NM_001026212 | 9 | 1892  | CAGUGCAAU | 1900  | 0.0068 |
| Cflar         | NM_207653    | 9 | 2971  | CAGUGCAAU | 2979  | 0.0188 |
| Robo1         | NM_019413    | 9 | 6175  | CAGUGCAAU | 6183  | 0.0066 |
| Lonrf2        | NM_001029878 | 9 | 3241  | CAGUGCAAU | 3249  | 0.0133 |
| Hspa4         | NM_008300    | 9 | 3764  | CAGUGCAAU | 3772  | 0.0069 |
| Flvcr2        | NM_145447    | 9 | 2737  | CAGUGCAAU | 2745  | 0.0056 |
| Gpr107        | NM_178760    | 9 | 3738  | CAGUGCAAU | 3746  | 0.0085 |
| Isx           | NM_027837    | 9 | 1698  | CAGUGCAAU | 1706  | 0.0023 |
| Zfp784        | NM_001039532 | 9 | 1345  | CAGUGCAAU | 1353  | 0.0046 |
| Usp8          | NM_019729    | 9 | 3867  | CAGUGCAAU | 3875  | 0.0027 |
| 5430435G22Rik | NM_145509    | 9 | 1326  | CAGUGCAAU | 1334  | 0.0068 |
| Zfp653        | NM_177318    | 9 | 2055  | CAGUGCAAU | 2063  | 0.0012 |
| Ms4a4b        | NM_021718    | 9 | 855   | CAGUGCAAU | 863   | 0.0018 |
| Phf20         | NM_172674    | 9 | 5596  | CAGUGCAAU | 5604  | 0.0096 |
| Mbip          | NM_145442    | 9 | 1239  | CAGUGCAAU | 1247  | 0.0015 |
| Cox5b         | NM_009942    | 9 | 549   | CAGUGCAAU | 557   | 0.0004 |
| Cmtm6         | NM_026036    | 9 | 1183  | CAGUGCAAU | 1191  | 0.0105 |
| Trib2         | NM_144551    | 9 | 2677  | CAGUGCAAU | 2685  | 0.0071 |
| Btbd3         | NM_145534    | 9 | 4684  | CAGUGCAAU | 4692  | 0.0113 |
| C1galt1       | NM_052993    | 9 | 1194  | CAGUGCAAU | 1202  | 0.0031 |
| Tmem109       | NM_134142    | 9 | 1272  | CAGUGCAAU | 1280  | 0.0042 |
| Mesdc2        | NM_023403    | 9 | 3321  | CAGUGCAAU | 3329  | 0.0134 |
| 5730455P16Rik | NM_027472    | 9 | 1280  | CAGUGCAAU | 1288  | 0.0099 |
| Tiam2         | NM_011878    | 8 | 6118  | CAGUGCAA  | 6125  | 0.0102 |
| Ugt8a         | NM_011674    | 8 | 2908  | CAGUGCAA  | 2915  | 0.0282 |
| Cxcl13        | NM_018866    | 8 | 1025  | CAGUGCAA  | 1032  | 0.0121 |
| Sgpp2         | NM_001004173 | 8 | 3523  | CAGUGCAA  | 3530  | 0.0427 |
| Acvr1         | NM_007394    | 8 | 2405  | CAGUGCAA  | 2412  | 0.0169 |
| Numa1         | NM_133947    | 8 | 7049  | CAGUGCAA  | 7056  | 0.0117 |
| Armc9         | NM_027507    | 8 | 3673  | CAGUGCAA  | 3680  | 0.0396 |
| D4Ert22e      | NM_001025608 | 8 | 628   | CAGUGCAA  | 635   | 0.0413 |
| Ube4b         | NM_022022    | 8 | 4652  | CAGUGCAA  | 4659  | 0.0194 |
| Gemin8        | NM_146238    | 8 | 1374  | CAGUGCAA  | 1381  | 0.0153 |
| Scamp5        | NM_020270    | 8 | 1062  | CAGUGCAA  | 1069  | 0.0368 |
| Slc22a2       | NM_013667    | 8 | 1911  | CAGUGCAA  | 1918  | 0.0058 |
| Gnpnat1       | NM_019425    | 8 | 2152  | CAGUGCAA  | 2159  | 0.0288 |
| Cdc2a         | NM_007659    | 8 | 2578  | CAGUGCAA  | 2585  | 0.0280 |
| Nr2c2ap       | NM_001025586 | 8 | 895   | CAGUGCAA  | 902   | 0.0081 |
| Zfp560        | NM_001004190 | 8 | 4523  | CAGUGCAA  | 4530  | 0.0325 |
| 1110018G07Rik | NM_178065    | 8 | 3907  | CAGUGCAA  | 3914  | 0.0355 |
| Tomm7         | NM_025394    | 8 | 871   | CAGUGCAA  | 878   | 0.0134 |
| Ttyh3         | NM_175274    | 8 | 2567  | CAGUGCAA  | 2574  | 0.0421 |
| Tmem9b        | NM_020050    | 8 | 1211  | CAGUGCAA  | 1218  | 0.0151 |

|               |              |   |      |          |      |        |
|---------------|--------------|---|------|----------|------|--------|
| Zfpm2         | NM_011766    | 8 | 4277 | CAGUGCAA | 4284 | 0.0154 |
| Rab14         | NM_026697    | 8 | 1965 | CAGUGCAA | 1972 | 0.0313 |
| Taf4a         | NM_001081092 | 8 | 3798 | CAGUGCAA | 3805 | 0.0195 |
| B4galt5       | NM_019835    | 8 | 4061 | CAGUGCAA | 4068 | 0.0432 |
| Txnip         | NM_001009935 | 8 | 2094 | CAGUGCAA | 2101 | 0.0201 |
| D130043K22Rik | NM_001081051 | 8 | 3626 | CAGUGCAA | 3633 | 0.0222 |
| 2600010E01Rik | NM_001083810 | 8 | 2338 | CAGUGCAA | 2345 | 0.0415 |
| Stam          | NM_011484    | 8 | 1984 | CAGUGCAA | 1991 | 0.0284 |
| Pank1         | NM_023792    | 8 | 1790 | CAGUGCAA | 1797 | 0.0219 |
| Jph3          | NM_020605    | 8 | 3201 | CAGUGCAA | 3208 | 0.0203 |
| Mfge8         | NM_008594    | 8 | 1978 | CAGUGCAA | 1985 | 0.0100 |
| Adcy2         | NM_153534    | 8 | 3724 | CAGUGCAA | 3731 | 0.0103 |
| Fbln7         | NM_024237    | 8 | 2715 | CAGUGCAA | 2722 | 0.0220 |
| 1300001I01Rik | NM_001081158 | 8 | 4348 | CAGUGCAA | 4355 | 0.0187 |
| Mafb          | NM_010658    | 8 | 2894 | CAGUGCAA | 2901 | 0.0295 |
| 9130213B05Rik | NM_145562    | 8 | 1358 | CAGUGCAA | 1365 | 0.0151 |
| Nrarp         | NM_025980    | 8 | 1371 | CAGUGCAA | 1378 | 0.0285 |
| Tbc1d9b       | NM_029745    | 8 | 4286 | CAGUGCAA | 4293 | 0.0212 |
| Lin28         | NM_145833    | 8 | 811  | CAGUGCAA | 818  | 0.0415 |
| Slitrk5       | NM_198865    | 8 | 4239 | CAGUGCAA | 4246 | 0.0202 |
| Dnajb6        | NM_001037940 | 8 | 2641 | CAGUGCAA | 2648 | 0.0206 |
| Fmo9          | NM_172844    | 8 | 2165 | CAGUGCAA | 2172 | 0.0186 |
| Pde1a         | NM_016744    | 8 | 2128 | CAGUGCAA | 2135 | 0.0374 |
| Mknk1         | NM_021461    | 8 | 2118 | CAGUGCAA | 2125 | 0.0161 |
| E2f4          | NM_148952    | 8 | 1466 | CAGUGCAA | 1473 | 0.0108 |
| Nf1           | NM_010897    | 8 | 8697 | CAGUGCAA | 8704 | 0.0478 |
| Lad1          | NM_133664    | 8 | 2485 | CAGUGCAA | 2492 | 0.0155 |
| E2f7          | NM_178609    | 8 | 5262 | CAGUGCAA | 5269 | 0.0381 |
| Arfp1         | NM_001081093 | 8 | 1649 | CAGUGCAA | 1656 | 0.0252 |
| BC003266      | NM_030252    | 8 | 779  | CAGUGCAA | 786  | 0.0097 |
| Wscd2         | NM_177292    | 8 | 3104 | CAGUGCAA | 3111 | 0.0456 |
| Dennd3        | NM_001081066 | 8 | 4447 | CAGUGCAA | 4454 | 0.0195 |
| Galnact2      | NM_030165    | 8 | 2792 | CAGUGCAA | 2799 | 0.0251 |
| Ntrk2         | NM_001025074 | 8 | 3890 | CAGUGCAA | 3897 | 0.0245 |
| Hectd2        | NM_172637    | 8 | 3986 | CAGUGCAA | 3993 | 0.0343 |
| Zmat4         | NM_177086    | 8 | 3693 | CAGUGCAA | 3700 | 0.0497 |
| Myst2         | NM_177619    | 8 | 2609 | CAGUGCAA | 2616 | 0.0232 |
| Tmem16a       | NM_178642    | 8 | 4224 | CAGUGCAA | 4231 | 0.0206 |
| Zfp39         | NM_011758    | 8 | 3766 | CAGUGCAA | 3773 | 0.0245 |
| Tspan1        | NM_133681    | 8 | 1291 | CAGUGCAA | 1298 | 0.0167 |
| Lrch1         | NM_001033439 | 8 | 3396 | CAGUGCAA | 3403 | 0.0354 |
| Nptn          | NM_009145    | 8 | 1764 | CAGUGCAA | 1771 | 0.0157 |
| Barhl2        | NM_001005477 | 8 | 2046 | CAGUGCAA | 2053 | 0.0129 |
| Fmr1          | NM_008031    | 8 | 2862 | CAGUGCAA | 2869 | 0.0346 |
| Sgcb          | NM_011890    | 8 | 1176 | CAGUGCAA | 1183 | 0.0410 |
| Epb4.9        | NM_013514    | 8 | 2626 | CAGUGCAA | 2633 | 0.0162 |
| Rdh13         | NM_175372    | 8 | 1248 | CAGUGCAA | 1255 | 0.0293 |
| Nrf1          | NM_010938    | 8 | 3015 | CAGUGCAA | 3022 | 0.0268 |
| Sephs2        | NM_009266    | 8 | 1761 | CAGUGCAA | 1768 | 0.0107 |
| Adamts18      | NM_172466    | 8 | 4246 | CAGUGCAA | 4253 | 0.0126 |
| Nup62         | NM_053074    | 8 | 2142 | CAGUGCAA | 2149 | 0.0103 |
| Syne1         | NM_153399    | 8 | 6379 | CAGUGCAA | 6386 | 0.0338 |
| Trim45        | NM_194343    | 8 | 3447 | CAGUGCAA | 3454 | 0.0367 |
| Madd          | NM_145527    | 8 | 5426 | CAGUGCAA | 5433 | 0.0161 |
| Map2k1        | NM_008927    | 8 | 1791 | CAGUGCAA | 1798 | 0.0135 |
| Fbxo3         | NM_212433    | 8 | 4246 | CAGUGCAA | 4253 | 0.0470 |
| Mcart6        | NM_001082412 | 8 | 2685 | CAGUGCAA | 2692 | 0.0237 |
| Agrn          | NM_021604    | 8 | 5896 | CAGUGCAA | 5903 | 0.0186 |
| Csnk2a1       | NM_007788    | 8 | 3542 | CAGUGCAA | 3549 | 0.0414 |

|               |              |   |       |          |       |        |
|---------------|--------------|---|-------|----------|-------|--------|
| Mfsd2         | NM_029662    | 8 | 1821  | CAGUGCAA | 1828  | 0.0062 |
| Hivep1        | NM_007772    | 8 | 8565  | CAGUGCAA | 8572  | 0.0078 |
| Stard13       | NM_146258    | 8 | 4236  | CAGUGCAA | 4243  | 0.0307 |
| Pmm2          | NM_016881    | 8 | 1081  | CAGUGCAA | 1088  | 0.0152 |
| Enpp4         | NM_199016    | 8 | 4258  | CAGUGCAA | 4265  | 0.0448 |
| BC006779      | NM_183162    | 8 | 9433  | CAGUGCAA | 9440  | 0.0173 |
| Saps1         | NM_172894    | 8 | 3216  | CAGUGCAA | 3223  | 0.0116 |
| Clcn4-2       | NM_011334    | 8 | 2802  | CAGUGCAA | 2809  | 0.0287 |
| Smad2         | NM_010754    | 8 | 2255  | CAGUGCAA | 2262  | 0.0152 |
| A130022J15Rik | NM_175313    | 8 | 2392  | CAGUGCAA | 2399  | 0.0169 |
| Snx7          | NM_029655    | 8 | 1337  | CAGUGCAA | 1344  | 0.0069 |
| Canx          | NM_007597    | 8 | 3524  | CAGUGCAA | 3531  | 0.0349 |
| Adamts1       | NM_009621    | 8 | 3616  | CAGUGCAA | 3623  | 0.0240 |
| Bcap29        | NM_007530    | 8 | 1675  | CAGUGCAA | 1682  | 0.0152 |
| Sulf1         | NM_172294    | 8 | 3220  | CAGUGCAA | 3227  | 0.0233 |
| 4931406C07Rik | NM_133732    | 8 | 1616  | CAGUGCAA | 1623  | 0.0223 |
| Mier1         | NM_027696    | 8 | 4686  | CAGUGCAA | 4693  | 0.0447 |
| Pcdhb18       | NM_053143    | 8 | 4968  | CAGUGCAA | 4975  | 0.0375 |
| 1110054O05Rik | NM_001013577 | 8 | 714   | CAGUGCAA | 721   | 0.0407 |
| 2310046K01Rik | NM_027172    | 8 | 1692  | CAGUGCAA | 1699  | 0.0166 |
| Rpo1-1        | NM_009085    | 8 | 1168  | CAGUGCAA | 1175  | 0.0028 |
| Hrb           | NM_010472    | 8 | 1982  | CAGUGCAA | 1989  | 0.0184 |
| 1110033F04Rik | NM_001048196 | 8 | 767   | CAGUGCAA | 774   | 0.0068 |
| Chmp7         | NM_134078    | 8 | 2459  | CAGUGCAA | 2466  | 0.0191 |
| Gpr12         | NM_001010941 | 8 | 1595  | CAGUGCAA | 1602  | 0.0147 |
| Nek6          | NM_021606    | 8 | 3458  | CAGUGCAA | 3465  | 0.0396 |
| Irf4          | NM_013674    | 8 | 3542  | CAGUGCAA | 3549  | 0.0485 |
| Actr5         | NM_175419    | 8 | 2327  | CAGUGCAA | 2334  | 0.0049 |
| Sepp1         | NM_009155    | 8 | 1749  | CAGUGCAA | 1756  | 0.0121 |
| Etl4          | NM_001081006 | 8 | 6853  | CAGUGCAA | 6860  | 0.0200 |
| Usp33         | NM_133247    | 8 | 3442  | CAGUGCAA | 3449  | 0.0191 |
| Agtr1a        | NM_177322    | 8 | 2059  | CAGUGCAA | 2066  | 0.0126 |
| Lnpep         | NM_172827    | 8 | 3236  | CAGUGCAA | 3243  | 0.0304 |
| Cst6          | NM_028623    | 8 | 795   | CAGUGCAA | 802   | 0.0485 |
| Stk11ip       | NM_027886    | 8 | 3394  | CAGUGCAA | 3401  | 0.0169 |
| Ssbp2         | NM_024272    | 8 | 2357  | CAGUGCAA | 2364  | 0.0409 |
| Tnip3         | NM_001001495 | 8 | 3587  | CAGUGCAA | 3594  | 0.0438 |
| D1Ert622e     | NM_133825    | 8 | 1415  | CAGUGCAA | 1422  | 0.0275 |
| Slc17a1       | NM_009198    | 8 | 1865  | CAGUGCAA | 1872  | 0.0069 |
| Prei4         | NM_028802    | 8 | 2644  | CAGUGCAA | 2651  | 0.0222 |
| Mdfic         | NM_175088    | 8 | 1235  | CAGUGCAA | 1242  | 0.0345 |
| Ube3b         | NM_054093    | 8 | 4407  | CAGUGCAA | 4414  | 0.0226 |
| Arrdc3        | NM_001042591 | 8 | 2389  | CAGUGCAA | 2396  | 0.0393 |
| Dynll2        | NM_026556    | 8 | 607   | CAGUGCAA | 614   | 0.0286 |
| Ptpre         | NM_011212    | 8 | 3478  | CAGUGCAA | 3485  | 0.0446 |
| Limk2         | NM_010718    | 8 | 3494  | CAGUGCAA | 3501  | 0.0353 |
| Ddx58         | NM_172689    | 8 | 3390  | CAGUGCAA | 3397  | 0.0305 |
| Csmd1         | NM_053171    | 8 | 12681 | CAGUGCAA | 12688 | 0.0472 |
| Fut11         | NM_028428    | 8 | 2113  | CAGUGCAA | 2120  | 0.0277 |
| S1pr3         | NM_010101    | 8 | 1997  | CAGUGCAA | 2004  | 0.0429 |
| Skp1a         | NM_011543    | 8 | 666   | CAGUGCAA | 673   | 0.0127 |
| Mgst3         | NM_025569    | 8 | 573   | CAGUGCAA | 580   | 0.0018 |
| Gap43         | NM_008083    | 8 | 1106  | CAGUGCAA | 1113  | 0.0073 |
| Limd2         | NM_172397    | 8 | 2599  | CAGUGCAA | 2606  | 0.0362 |
| Snx27         | NM_001082484 | 8 | 2113  | CAGUGCAA | 2120  | 0.0083 |
| 2310035C23Rik | NM_173187    | 8 | 4032  | CAGUGCAA | 4039  | 0.0230 |
| Ptgfr         | NM_008966    | 8 | 1725  | CAGUGCAA | 1732  | 0.0449 |
| Baz2a         | NM_054078    | 8 | 7356  | CAGUGCAA | 7363  | 0.0382 |
| 5730470L24Rik | NM_025679    | 8 | 1857  | CAGUGCAA | 1864  | 0.0316 |



|               |              |   |      |          |      |        |
|---------------|--------------|---|------|----------|------|--------|
| Il6st         | NM_010560    | 8 | 3220 | CAGUGCAA | 3227 | 0.0367 |
| C330016O10Rik | NM_145974    | 8 | 2107 | CAGUGCAA | 2114 | 0.0084 |
| Amigo1        | NM_001004293 | 8 | 3822 | CAGUGCAA | 3829 | 0.0467 |
| Akap1         | NM_009648    | 8 | 2788 | CAGUGCAA | 2795 | 0.0146 |
| Fbxw8         | NM_172721    | 8 | 2178 | CAGUGCAA | 2185 | 0.0463 |
| Ccna2         | NM_009828    | 8 | 2231 | CAGUGCAA | 2238 | 0.0209 |
| Nox4          | NM_015760    | 8 | 2728 | CAGUGCAA | 2735 | 0.0258 |
| Gbl           | NM_019988    | 8 | 1814 | CAGUGCAA | 1821 | 0.0342 |
| Homer3        | NM_011984    | 8 | 1261 | CAGUGCAA | 1268 | 0.0182 |
| Cd1d1         | NM_007639    | 8 | 1353 | CAGUGCAA | 1360 | 0.0113 |
| Pad16         | NM_153106    | 8 | 2192 | CAGUGCAA | 2199 | 0.0034 |
| Tcp1          | NM_013686    | 8 | 1908 | CAGUGCAA | 1915 | 0.0090 |
| Add1          | NM_001024458 | 8 | 3647 | CAGUGCAA | 3654 | 0.0225 |
| D14Ert436e    | NM_172599    | 8 | 2968 | CAGUGCAA | 2975 | 0.0292 |
| Nkd1          | NM_001081364 | 8 | 6274 | CAGUGCAA | 6281 | 0.0121 |
| Inhbb         | NM_008381    | 8 | 3784 | CAGUGCAA | 3791 | 0.0279 |
| Mpp3          | NM_007863    | 8 | 2117 | CAGUGCAA | 2124 | 0.0138 |
| Wnt2b         | NM_009520    | 8 | 1722 | CAGUGCAA | 1729 | 0.0325 |
| Lif           | NM_008501    | 8 | 3800 | CAGUGCAA | 3807 | 0.0474 |
| Il17rb        | NM_019583    | 8 | 1946 | CAGUGCAA | 1953 | 0.0069 |
| Ltf           | NM_008522    | 8 | 2604 | CAGUGCAA | 2611 | 0.0089 |
| Spsb3         | NM_027141    | 8 | 1519 | CAGUGCAA | 1526 | 0.0068 |
| Ear11         | NM_053113    | 8 | 590  | CAGUGCAA | 597  | 0.0032 |
| Mmd           | NM_026178    | 8 | 1061 | CAGUGCAA | 1068 | 0.0275 |
| Zfp352        | NM_153102    | 8 | 2128 | CAGUGCAA | 2135 | 0.0064 |
| Zfyve26       | NM_001008550 | 8 | 9101 | CAGUGCAA | 9108 | 0.0244 |
| Plat          | NM_008872    | 8 | 2181 | CAGUGCAA | 2188 | 0.0115 |
| Btaf1         | NM_001080706 | 8 | 6028 | CAGUGCAA | 6035 | 0.0397 |
| Ubxn8         | NM_178648    | 8 | 1002 | CAGUGCAA | 1009 | 0.0292 |
| Tmem55a       | NM_028264    | 8 | 1997 | CAGUGCAA | 2004 | 0.0210 |
| Arl6ip1       | NM_019419    | 8 | 1216 | CAGUGCAA | 1223 | 0.0213 |
| Hadhb         | NM_145558    | 8 | 1494 | CAGUGCAA | 1501 | 0.0077 |
| Map2k2        | NM_023138    | 8 | 2170 | CAGUGCAA | 2177 | 0.0149 |
| lvns1abp      | NM_001039512 | 8 | 3364 | CAGUGCAA | 3371 | 0.0163 |
| Tor3a         | NM_023141    | 8 | 1840 | CAGUGCAA | 1847 | 0.0173 |
| Lipa          | NM_021460    | 8 | 2448 | CAGUGCAA | 2455 | 0.0254 |
| Pea15a        | NM_011063    | 8 | 1543 | CAGUGCAA | 1550 | 0.0285 |
| Depdc1b       | NM_178683    | 8 | 2205 | CAGUGCAA | 2212 | 0.0130 |
| Ube2d3        | NM_025356    | 8 | 2295 | CAGUGCAA | 2302 | 0.0291 |
| Nme4          | NM_019731    | 8 | 584  | CAGUGCAA | 591  | 0.0043 |
| Abca1         | NM_013454    | 8 | 7159 | CAGUGCAA | 7166 | 0.0470 |
| Usp32         | NM_001029934 | 8 | 6112 | CAGUGCAA | 6119 | 0.0297 |
| Wnt1          | NM_021279    | 8 | 1683 | CAGUGCAA | 1690 | 0.0140 |
| Mllt10        | NM_010804    | 8 | 3461 | CAGUGCAA | 3468 | 0.0238 |
| Kcns2         | NM_181317    | 8 | 3999 | CAGUGCAA | 4006 | 0.0361 |
| Apobec2       | NM_009694    | 8 | 914  | CAGUGCAA | 921  | 0.0064 |
| Zfp41         | NM_001044718 | 8 | 2973 | CAGUGCAA | 2980 | 0.0396 |
| S1pr1         | NM_007901    | 8 | 1929 | CAGUGCAA | 1936 | 0.0205 |
| Chrn4         | NM_148944    | 8 | 1705 | CAGUGCAA | 1712 | 0.0293 |
| Snx22         | NM_001025612 | 8 | 770  | CAGUGCAA | 777  | 0.0289 |
| 5031414D18Rik | NM_198642    | 8 | 2469 | CAGUGCAA | 2476 | 0.0069 |
| Rph3a         | NM_011286    | 8 | 4087 | CAGUGCAA | 4094 | 0.0253 |
| Loh12cr1      | NM_026371    | 8 | 1369 | CAGUGCAA | 1376 | 0.0136 |
| Akap7         | NM_018747    | 8 | 2837 | CAGUGCAA | 2844 | 0.0297 |
| Tpp1          | NM_009906    | 8 | 3358 | CAGUGCAA | 3365 | 0.0269 |
| Tnrc6c        | NM_198022    | 8 | 7084 | CAGUGCAA | 7091 | 0.0389 |
| Efnb2         | NM_010111    | 8 | 4012 | CAGUGCAA | 4019 | 0.0469 |
| Meox2         | NM_008584    | 8 | 1467 | CAGUGCAA | 1474 | 0.0174 |
| Rtcd1         | NM_025517    | 8 | 1250 | CAGUGCAA | 1257 | 0.0041 |

|                 |              |   |       |          |       |        |
|-----------------|--------------|---|-------|----------|-------|--------|
| Eif4h           | NM_033561    | 8 | 1636  | CAGUGCAA | 1643  | 0.0246 |
| Npep1           | NM_213733    | 8 | 1685  | CAGUGCAA | 1692  | 0.0070 |
| Ykt6            | NM_019661    | 8 | 1108  | CAGUGCAA | 1115  | 0.0261 |
| Mnt             | NM_010813    | 8 | 3323  | CAGUGCAA | 3330  | 0.0363 |
| Itpk1           | NM_172584    | 8 | 2373  | CAGUGCAA | 2380  | 0.0233 |
| Eif4e3          | NM_025829    | 8 | 1970  | CAGUGCAA | 1977  | 0.0281 |
| Med17           | NM_144933    | 8 | 3222  | CAGUGCAA | 3229  | 0.0284 |
| Snf1lk          | NM_010831    | 8 | 2692  | CAGUGCAA | 2699  | 0.0306 |
| Upk1b           | NM_178924    | 8 | 1364  | CAGUGCAA | 1371  | 0.0138 |
| B3galnt1        | NM_020026    | 8 | 1864  | CAGUGCAA | 1871  | 0.0113 |
| 1810026J23Rik   | NM_178619    | 8 | 3026  | CAGUGCAA | 3033  | 0.0319 |
| Fggy            | NM_029347    | 8 | 1609  | CAGUGCAA | 1616  | 0.0091 |
| Rad23b          | NM_009011    | 8 | 3000  | CAGUGCAA | 3007  | 0.0338 |
| Clrn3           | NM_178669    | 8 | 852   | CAGUGCAA | 859   | 0.0372 |
| Lrp2            | NM_001081088 | 8 | 14360 | CAGUGCAA | 14367 | 0.0198 |
| Prnp            | NM_011170    | 8 | 1878  | CAGUGCAA | 1885  | 0.0190 |
| Pygb            | NM_153781    | 8 | 3580  | CAGUGCAA | 3587  | 0.0190 |
| Ppp1r2          | NM_025800    | 8 | 1571  | CAGUGCAA | 1578  | 0.0472 |
| Rab34           | NM_033475    | 8 | 1364  | CAGUGCAA | 1371  | 0.0055 |
| Rnpep1          | NM_181405    | 8 | 1933  | CAGUGCAA | 1940  | 0.0115 |
| Tmem63b         | NM_198167    | 8 | 3095  | CAGUGCAA | 3102  | 0.0094 |
| Fzd4            | NM_008055    | 8 | 2677  | CAGUGCAA | 2684  | 0.0263 |
| Acot8           | NM_133240    | 8 | 1065  | CAGUGCAA | 1072  | 0.0024 |
| Leng1           | NM_027203    | 8 | 1714  | CAGUGCAA | 1721  | 0.0157 |
| AC123686.11-201 | NM_029048    | 8 | 1764  | CAGUGCAA | 1771  | 0.0274 |
| Ucp3            | NM_009464    | 8 | 1281  | CAGUGCAA | 1288  | 0.0200 |
| Wasl            | NM_028459    | 8 | 3988  | CAGUGCAA | 3995  | 0.0373 |
| Cblb            | NM_001033238 | 8 | 5985  | CAGUGCAA | 5992  | 0.0499 |
| Tulp3           | NM_011657    | 8 | 2032  | CAGUGCAA | 2039  | 0.0292 |
| Pip4k2a         | NM_008845    | 8 | 2144  | CAGUGCAA | 2151  | 0.0319 |
| Akap4           | NM_009651    | 8 | 2794  | CAGUGCAA | 2801  | 0.0029 |
| Gpd1            | NM_010271    | 8 | 2331  | CAGUGCAA | 2338  | 0.0263 |
| Slc25a19        | NM_026071    | 8 | 1252  | CAGUGCAA | 1259  | 0.0065 |
| Papss2          | NM_011864    | 8 | 2256  | CAGUGCAA | 2263  | 0.0244 |
| Nat14           | NM_201355    | 7 | 1332  | CAGUGCA  | 1338  | 0.0333 |
| Dpm2            | NM_010073    | 7 | 400   | CAGUGCA  | 406   | 0.0342 |
| Apol7c          | NM_175391    | 7 | 1561  | CAGUGCA  | 1567  | 0.0458 |
| Oas1c           | NM_033541    | 7 | 2137  | CAGUGCA  | 2143  | 0.0497 |
| Chrne           | NM_009603    | 7 | 1505  | CAGUGCA  | 1511  | 0.0060 |
| Tmsb4x          | NM_021278    | 7 | 284   | CAGUGCA  | 290   | 0.0245 |
| Gadd45g         | NM_011817    | 7 | 969   | CAGUGCA  | 975   | 0.0307 |
| 1810023F06Rik   | NM_145449    | 7 | 995   | CAGUGCA  | 1001  | 0.0142 |
| Dpp3            | NM_133803    | 7 | 2426  | CAGUGCA  | 2432  | 0.0254 |
| Tex24           | NM_001013609 | 7 | 1390  | CAGUGCA  | 1396  | 0.0414 |
| Hspa1b          | NM_010478    | 7 | 2399  | CAGUGCA  | 2405  | 0.0389 |
| 4930589M24Rik   | NM_001081428 | 7 | 3591  | CAGUGCA  | 3597  | 0.0294 |
| Thsd1           | NM_019576    | 7 | 2673  | CAGUGCA  | 2679  | 0.0133 |
| 1810037C20Rik   | NM_025473    | 7 | 1541  | CAGUGCA  | 1547  | 0.0371 |
| Acoxl           | NM_028765    | 7 | 2606  | CAGUGCA  | 2612  | 0.0440 |
| Ccnf            | NM_007634    | 7 | 2985  | CAGUGCA  | 2991  | 0.0398 |
| Kcnj8           | NM_008428    | 7 | 1695  | CAGUGCA  | 1701  | 0.0398 |
| Nola2           | NM_026631    | 7 | 816   | CAGUGCA  | 822   | 0.0299 |
| Txndc12         | NM_025334    | 7 | 1093  | CAGUGCA  | 1099  | 0.0403 |
| Slc2a6          | NM_172659    | 7 | 1633  | CAGUGCA  | 1639  | 0.0330 |
| Gimap7          | NM_146167    | 7 | 1217  | CAGUGCA  | 1223  | 0.0177 |
| Rmnd1           | NM_025343    | 7 | 1742  | CAGUGCA  | 1748  | 0.0178 |
| Ndfip1          | NM_022996    | 7 | 830   | CAGUGCA  | 836   | 0.0126 |
| Poll            | NM_020032    | 7 | 2086  | CAGUGCA  | 2092  | 0.0319 |
| 0610012H03Rik   | NM_028747    | 7 | 1175  | CAGUGCA  | 1181  | 0.0469 |

|               |              |   |      |         |      |        |
|---------------|--------------|---|------|---------|------|--------|
| Lancl2        | NM_133737    | 7 | 2317 | CAGUGCA | 2323 | 0.0443 |
| Aes           | NM_010347    | 7 | 975  | CAGUGCA | 981  | 0.0401 |
| Slc26a4       | NM_011867    | 7 | 2613 | CAGUGCA | 2619 | 0.0315 |
| Nog           | NM_008711    | 7 | 1402 | CAGUGCA | 1408 | 0.0409 |
| Tspo          | NM_009775    | 7 | 786  | CAGUGCA | 792  | 0.0157 |
| Il13          | NM_008355    | 7 | 592  | CAGUGCA | 598  | 0.0443 |
| 9930012K11Rik | NM_001004155 | 7 | 1288 | CAGUGCA | 1294 | 0.0466 |
| Gm266         | NM_001033248 | 7 | 932  | CAGUGCA | 938  | 0.0334 |
| Oas1d         | NM_133893    | 7 | 1542 | CAGUGCA | 1548 | 0.0362 |
| Rcc2          | NM_173867    | 7 | 1723 | CAGUGCA | 1729 | 0.0164 |
| Cdh7          | NM_172853    | 7 | 2729 | CAGUGCA | 2735 | 0.0387 |
| Al118078      | NM_172923    | 7 | 2399 | CAGUGCA | 2405 | 0.0384 |
| Aurkb         | NM_011496    | 7 | 1765 | CAGUGCA | 1771 | 0.0360 |
| Vit           | NM_028813    | 7 | 2394 | CAGUGCA | 2400 | 0.0371 |
| BC052328      | NM_198301    | 7 | 1134 | CAGUGCA | 1140 | 0.0419 |
| Ebag9         | NM_019480    | 7 | 1028 | CAGUGCA | 1034 | 0.0387 |
| Msr2          | NM_030707    | 7 | 1618 | CAGUGCA | 1624 | 0.0248 |
| Gm853         | NM_001034872 | 7 | 1569 | CAGUGCA | 1575 | 0.0453 |
| Lrrc50        | NM_026648    | 7 | 2551 | CAGUGCA | 2557 | 0.0470 |
| Gcnt7         | NM_001039560 | 7 | 1959 | CAGUGCA | 1965 | 0.0448 |
| Ddit3         | NM_007837    | 7 | 751  | CAGUGCA | 757  | 0.0124 |
| Sh3tc2        | NM_172628    | 7 | 4179 | CAGUGCA | 4185 | 0.0390 |
| Hspa5         | NM_022310    | 7 | 2197 | CAGUGCA | 2203 | 0.0208 |
| Apbb3         | NM_146085    | 7 | 1930 | CAGUGCA | 1936 | 0.0178 |
| Pdlim7        | NM_026131    | 7 | 863  | CAGUGCA | 869  | 0.0240 |
| Mrps9         | NM_023514    | 7 | 1297 | CAGUGCA | 1303 | 0.0129 |
| Casr          | NM_013803    | 7 | 3871 | CAGUGCA | 3877 | 0.0468 |
| Hnt           | NM_172290    | 7 | 1522 | CAGUGCA | 1528 | 0.0342 |
| Ninj2         | NM_016718    | 7 | 738  | CAGUGCA | 744  | 0.0208 |
| H2-Q7         | NM_010394    | 7 | 1072 | CAGUGCA | 1078 | 0.0202 |
| Lypd3         | NM_133743    | 7 | 1233 | CAGUGCA | 1239 | 0.0328 |
| 2410008K03Rik | NM_028022    | 7 | 1418 | CAGUGCA | 1424 | 0.0307 |
| Gabrg2        | NM_008073    | 7 | 1962 | CAGUGCA | 1968 | 0.0276 |
| Adam8         | NM_007403    | 7 | 2821 | CAGUGCA | 2827 | 0.0322 |
| Hsd3b5        | NM_008295    | 7 | 1327 | CAGUGCA | 1333 | 0.0224 |
| Lmbr1l        | NM_029098    | 7 | 1768 | CAGUGCA | 1774 | 0.0312 |
| Tnnt3         | NM_011620    | 7 | 836  | CAGUGCA | 842  | 0.0105 |
| Eepd1         | NM_026189    | 7 | 2433 | CAGUGCA | 2439 | 0.0311 |
| Brpf1         | NM_030178    | 7 | 3966 | CAGUGCA | 3972 | 0.0331 |
| Chchd4        | NM_133928    | 7 | 586  | CAGUGCA | 592  | 0.0441 |
| Cyp46a1       | NM_010010    | 7 | 1818 | CAGUGCA | 1824 | 0.0347 |
| Top3a         | NM_009410    | 7 | 3339 | CAGUGCA | 3345 | 0.0279 |
| Speer4f       | NM_027609    | 7 | 1008 | CAGUGCA | 1014 | 0.0272 |
| Tmco4         | NM_029857    | 7 | 3123 | CAGUGCA | 3129 | 0.0386 |
| Ppp2r2d       | NM_026391    | 7 | 1983 | CAGUGCA | 1989 | 0.0356 |
| Abcf2         | NM_013853    | 7 | 2034 | CAGUGCA | 2040 | 0.0329 |
| Ccdc46        | NM_029606    | 7 | 3223 | CAGUGCA | 3229 | 0.0271 |
| Lrrc14        | NM_145471    | 7 | 2090 | CAGUGCA | 2096 | 0.0267 |
| BC046331      | NM_177673    | 7 | 3121 | CAGUGCA | 3127 | 0.0263 |
| Wnt10b        | NM_011718    | 7 | 1737 | CAGUGCA | 1743 | 0.0426 |
| Parp1         | NM_007415    | 7 | 3292 | CAGUGCA | 3298 | 0.0442 |
| Abi3          | NM_025659    | 7 | 1148 | CAGUGCA | 1154 | 0.0195 |
| BC029169      | NM_153782    | 7 | 2370 | CAGUGCA | 2376 | 0.0269 |
| Dok7          | NM_172708    | 7 | 2264 | CAGUGCA | 2270 | 0.0421 |
| Mlxipl        | NM_021455    | 7 | 2751 | CAGUGCA | 2757 | 0.0337 |
| Hsp90b1       | NM_011631    | 7 | 2604 | CAGUGCA | 2610 | 0.0158 |
| Wnt10a        | NM_009518    | 7 | 2255 | CAGUGCA | 2261 | 0.0343 |
| Rbm43         | NM_030243    | 7 | 1824 | CAGUGCA | 1830 | 0.0442 |
| Gstm1         | NM_010358    | 7 | 942  | CAGUGCA | 948  | 0.0260 |

|                |              |   |      |         |      |        |
|----------------|--------------|---|------|---------|------|--------|
| Ercc4          | NM_015769    | 7 | 3129 | CAGUGCA | 3135 | 0.0296 |
| Sardh          | NM_138665    | 7 | 3016 | CAGUGCA | 3022 | 0.0092 |
| Oas1e          | NM_145210    | 7 | 1520 | CAGUGCA | 1526 | 0.0377 |
| Zfp112         | NM_021307    | 7 | 3493 | CAGUGCA | 3499 | 0.0428 |
| Cnga4          | NM_001033317 | 7 | 2161 | CAGUGCA | 2167 | 0.0376 |
| Phc3           | NM_153421    | 7 | 3118 | CAGUGCA | 3124 | 0.0317 |
| Lsg1           | NM_178069    | 7 | 2088 | CAGUGCA | 2094 | 0.0232 |
| Gabrr1         | NM_008075    | 7 | 1657 | CAGUGCA | 1663 | 0.0441 |
| Gpi1           | NM_008155    | 7 | 1776 | CAGUGCA | 1782 | 0.0155 |
| Acsm5          | NM_178758    | 7 | 1956 | CAGUGCA | 1962 | 0.0345 |
| Thra           | NM_178060    | 7 | 1803 | CAGUGCA | 1809 | 0.0350 |
| Dexi           | NM_021428    | 7 | 1232 | CAGUGCA | 1238 | 0.0443 |
| Dnajc9         | NM_134081    | 7 | 1149 | CAGUGCA | 1155 | 0.0432 |
| Gdpd2          | NM_023608    | 7 | 2022 | CAGUGCA | 2028 | 0.0378 |
| Rassf8         | NM_027760    | 7 | 1470 | CAGUGCA | 1476 | 0.0239 |
| Syngn2         | NM_009304    | 7 | 1430 | CAGUGCA | 1436 | 0.0486 |
| Plekhg1        | NM_001033253 | 7 | 4426 | CAGUGCA | 4432 | 0.0059 |
| Rnaseh1        | NM_011275    | 7 | 964  | CAGUGCA | 970  | 0.0315 |
| ltsn2          | NM_011365    | 7 | 5696 | CAGUGCA | 5702 | 0.0457 |
| 2310008M10Rik  | NM_025509    | 7 | 606  | CAGUGCA | 612  | 0.0344 |
| Il18bp         | NM_010531    | 7 | 1134 | CAGUGCA | 1140 | 0.0412 |
| Lcor           | NM_172154    | 7 | 4231 | CAGUGCA | 4237 | 0.0301 |
| Gcdh           | NM_008097    | 7 | 1934 | CAGUGCA | 1940 | 0.0367 |
| Taldo1         | NM_011528    | 7 | 1072 | CAGUGCA | 1078 | 0.0117 |
| Cdkn2d         | NM_009878    | 7 | 1006 | CAGUGCA | 1012 | 0.0306 |
| 4931429I11Rik  | NM_001081121 | 7 | 2490 | CAGUGCA | 2496 | 0.0412 |
| Bag3           | NM_013863    | 7 | 1861 | CAGUGCA | 1867 | 0.0348 |
| Zbp1           | NM_021394    | 7 | 1953 | CAGUGCA | 1959 | 0.0363 |
| AC124479.4-201 | NM_001081471 | 7 | 1179 | CAGUGCA | 1185 | 0.0424 |
| BC024997       | NM_146004    | 7 | 1956 | CAGUGCA | 1962 | 0.0112 |
| Commd4         | NM_025417    | 7 | 662  | CAGUGCA | 668  | 0.0121 |
| Speer4d        | NM_025759    | 7 | 913  | CAGUGCA | 919  | 0.0214 |
| Oas1h          | NM_145228    | 7 | 1570 | CAGUGCA | 1576 | 0.0341 |
| BC048651       | NM_207258    | 7 | 1334 | CAGUGCA | 1340 | 0.0319 |
| Nkx6-1         | NM_144955    | 7 | 1769 | CAGUGCA | 1775 | 0.0141 |
| Tmsb10         | NM_001039392 | 7 | 466  | CAGUGCA | 472  | 0.0160 |
| Col25a1        | NM_198711    | 7 | 2737 | CAGUGCA | 2743 | 0.0433 |
| Vps39          | NM_147153    | 7 | 2862 | CAGUGCA | 2868 | 0.0298 |
| Ccdc59         | NM_025602    | 7 | 1070 | CAGUGCA | 1076 | 0.0201 |
| Ikzf5          | NM_026849    | 7 | 2426 | CAGUGCA | 2432 | 0.0363 |
| Snx2           | NM_026386    | 7 | 1818 | CAGUGCA | 1824 | 0.0264 |
| Slc35f5        | NM_028787    | 7 | 2158 | CAGUGCA | 2164 | 0.0472 |
| Clstn3         | NM_153508    | 7 | 3426 | CAGUGCA | 3432 | 0.0492 |
| Fanci          | NM_145946    | 7 | 4125 | CAGUGCA | 4131 | 0.0333 |
| Myst1          | NM_026370    | 7 | 1496 | CAGUGCA | 1502 | 0.0068 |
| Nip7           | NM_025391    | 7 | 1183 | CAGUGCA | 1189 | 0.0447 |
| Tcf25          | NM_001037878 | 7 | 2553 | CAGUGCA | 2559 | 0.0394 |
| Hspa12b        | NM_028306    | 7 | 2649 | CAGUGCA | 2655 | 0.0457 |
| Ng23           | NM_023893    | 7 | 468  | CAGUGCA | 474  | 0.0234 |
| Dvl3           | NM_007889    | 7 | 2569 | CAGUGCA | 2575 | 0.0401 |
| Glr5           | NM_028419    | 7 | 647  | CAGUGCA | 653  | 0.0277 |
| Hp             | NM_017370    | 7 | 1193 | CAGUGCA | 1199 | 0.0106 |
| Srebf1         | NM_011480    | 7 | 3584 | CAGUGCA | 3590 | 0.0496 |
| Nppc           | NM_010933    | 7 | 553  | CAGUGCA | 559  | 0.0317 |
| Inf2           | NM_198411    | 7 | 4248 | CAGUGCA | 4254 | 0.0407 |
| Il10rb         | NM_008349    | 7 | 1186 | CAGUGCA | 1192 | 0.0309 |
| B4galt2        | NM_017377    | 7 | 1853 | CAGUGCA | 1859 | 0.0496 |
| Pepd           | NM_008820    | 7 | 1783 | CAGUGCA | 1789 | 0.0207 |
| Tmem131        | NM_018872    | 7 | 5937 | CAGUGCA | 5943 | 0.0446 |

|               |              |   |      |         |      |        |
|---------------|--------------|---|------|---------|------|--------|
| Snpc2         | NM_133968    | 7 | 1311 | CAGUGCA | 1317 | 0.0258 |
| Prrxl1        | NM_001001796 | 7 | 1298 | CAGUGCA | 1304 | 0.0467 |
| Ttc33         | NM_026213    | 7 | 1085 | CAGUGCA | 1091 | 0.0496 |
| Klc3          | NM_146182    | 7 | 1693 | CAGUGCA | 1699 | 0.0122 |
| Gabrb1        | NM_008069    | 7 | 1804 | CAGUGCA | 1810 | 0.0262 |
| Lamp1         | NM_010684    | 7 | 2125 | CAGUGCA | 2131 | 0.0471 |
| Dtna          | NM_010087    | 7 | 1677 | CAGUGCA | 1683 | 0.0153 |
| Morn5         | NM_029309    | 7 | 682  | CAGUGCA | 688  | 0.0074 |
| Socs2         | NM_007706    | 7 | 1396 | CAGUGCA | 1402 | 0.0367 |
| Ppa2          | NM_146141    | 7 | 1072 | CAGUGCA | 1078 | 0.0126 |
| Dap3          | NM_022994    | 7 | 1702 | CAGUGCA | 1708 | 0.0241 |
| Echdc2        | NM_026728    | 7 | 992  | CAGUGCA | 998  | 0.0195 |
| Gnpat         | NM_010322    | 7 | 2596 | CAGUGCA | 2602 | 0.0443 |
| Zbtb8a        | NM_028603    | 7 | 1863 | CAGUGCA | 1869 | 0.0324 |
| Dyrk1b        | NM_001037957 | 7 | 2271 | CAGUGCA | 2277 | 0.0224 |
| Fut8          | NM_016893    | 7 | 2510 | CAGUGCA | 2516 | 0.0401 |
| Pfdn5         | NM_027044    | 7 | 542  | CAGUGCA | 548  | 0.0103 |
| 2310007H09Rik | NM_029609    | 7 | 1282 | CAGUGCA | 1288 | 0.0436 |
| AC152410.6    | NM_027829    | 7 | 752  | CAGUGCA | 758  | 0.0140 |
| 4930504E06Rik | NM_133858    | 7 | 2449 | CAGUGCA | 2455 | 0.0259 |
| Slc26a5       | NM_030727    | 7 | 2612 | CAGUGCA | 2618 | 0.0296 |
| Lipi          | NM_177142    | 7 | 1404 | CAGUGCA | 1410 | 0.0306 |
| 4732473B16Rik | NM_175307    | 7 | 2278 | CAGUGCA | 2284 | 0.0498 |
| Polr2c        | NM_009090    | 7 | 960  | CAGUGCA | 966  | 0.0387 |
| Atp6v0d1      | NM_013477    | 7 | 1208 | CAGUGCA | 1214 | 0.0261 |
| Tmem128       | NM_025480    | 7 | 598  | CAGUGCA | 604  | 0.0340 |
| Dhrs13        | NM_183286    | 7 | 1488 | CAGUGCA | 1494 | 0.0332 |
| Spg3a         | NM_178628    | 7 | 2497 | CAGUGCA | 2503 | 0.0414 |
| AC153819.5    | NM_018769    | 7 | 1747 | CAGUGCA | 1753 | 0.0319 |
| Cebpe         | NM_207131    | 7 | 1221 | CAGUGCA | 1227 | 0.0107 |
| Apol7a        | NM_029419    | 7 | 1892 | CAGUGCA | 1898 | 0.0466 |
| Wdr20b        | NM_027614    | 7 | 2048 | CAGUGCA | 2054 | 0.0167 |
| Gstm3         | NM_010359    | 7 | 763  | CAGUGCA | 769  | 0.0317 |
| Wnt16         | NM_053116    | 7 | 1451 | CAGUGCA | 1457 | 0.0176 |
| Hes1          | NM_008235    | 7 | 1257 | CAGUGCA | 1263 | 0.0244 |
| Myo1f         | NM_053214    | 7 | 3508 | CAGUGCA | 3514 | 0.0242 |
| Nup188        | NM_198304    | 7 | 5324 | CAGUGCA | 5330 | 0.0232 |
| 2510039O18Rik | NM_029841    | 7 | 2186 | CAGUGCA | 2192 | 0.0416 |
| Plk1          | NM_011121    | 7 | 1967 | CAGUGCA | 1973 | 0.0172 |
| 1810022C23Rik | NM_026947    | 7 | 1050 | CAGUGCA | 1056 | 0.0190 |
| Rps24         | NM_207634    | 7 | 618  | CAGUGCA | 624  | 0.0217 |
| Eps8l1        | NM_026146    | 7 | 2368 | CAGUGCA | 2374 | 0.0190 |
| Zc3h8         | NM_020594    | 7 | 1190 | CAGUGCA | 1196 | 0.0360 |
| Slc13a1       | NM_019481    | 7 | 2041 | CAGUGCA | 2047 | 0.0408 |
| Gnrh1         | NM_008145    | 7 | 379  | CAGUGCA | 385  | 0.0094 |
| Pnpla6        | NM_015801    | 7 | 4373 | CAGUGCA | 4379 | 0.0155 |
| Ifitm6        | NM_001033632 | 7 | 460  | CAGUGCA | 466  | 0.0117 |
| Srd5a2l       | NM_020611    | 7 | 1437 | CAGUGCA | 1443 | 0.0412 |
| Raly          | NM_023130    | 7 | 1632 | CAGUGCA | 1638 | 0.0224 |
| Ppp3ca        | NM_008913    | 7 | 1958 | CAGUGCA | 1964 | 0.0332 |
| Lefty1        | NM_010094    | 7 | 1402 | CAGUGCA | 1408 | 0.0267 |
| EG331493      | NM_001033541 | 7 | 1250 | CAGUGCA | 1256 | 0.0478 |

**Comprehensive view of miRNA predicted targets on mRNA 3' UTR region produced by miRWalk and other programs**

**Note : The below table displays all putative targets produced by both miRWalk and other programs i.e. contains all the putative targets of other programs (3rd party algorithms).**

| MicroRNA    | Gene | miRanda | miRDB | miRWalk | RNA22 | Targetscan | SUM |
|-------------|------|---------|-------|---------|-------|------------|-----|
| mmu-miR-721 | Nos2 | 1       | 0     | 0       | 0     | 1          | 2   |
